# Supplementary material for: Design, synthesis and cholinesterase inhibitory properties of new oxazole benzylamine derivatives
Source: PubMed Central journal article supplement (PMC6968547; doi:10.1080/14756366.2019.1707197), 2020-01-03

## Supplemental Material

### Design, synthesis and cholinesterase inhibitory properties of new oxazole benzylamine derivatives

Ivana Šagud<sup>1,§</sup>, Nikolina Maček Hrvat<sup>2,§</sup>, Ana Grgičević<sup>1</sup>, Tena Čadež<sup>2</sup>, Josipa Hodak<sup>1</sup>, Milena Dragojević<sup>1</sup>, Kornelija Lasić<sup>3</sup>, Zrinka Kovarik<sup>2\*</sup> and Irena Škorić<sup>1\*</sup>

<sup>1</sup>Department of Organic Chemistry, Faculty of Chemical Engineering and Technology, University of Zagreb, Marulićev trg 19, 10000 Zagreb, Croatia

<sup>2</sup>Institute for Medical Research and Occupational Health, Ksaverska cesta 2, 10000 Zagreb, Croatia

<sup>3</sup>Pliva Tapi R&D, TEVA, Prilaz Baruna Filipovića 25, 10000 Zagreb, Croatia

<sup>§</sup>These authors contributed equally.

\*Corresponding authors:

Dr. Zrinka Kovarik, [zkovarik@imi.hr](mailto:zkovarik@imi.hr)

Prof. Irena Škorić, [iskoric@fkit.hr](mailto:iskoric@fkit.hr)

## CONTENT

- Figure S1.**  $^1\text{H}$  and  $^{13}\text{C}$  NMR spectra of (*E*)-*N*-benzyl-4-(2-(oxazol-5-yl)vinyl)aniline (*trans*-2)
- Figure S2.**  $^1\text{H}$  and  $^{13}\text{C}$  NMR spectra of (*E*)-*N*-(4-methylbenzyl)-4-(2-(oxazol-5-yl)vinyl)aniline (*trans*-3)
- Figure S3.**  $^1\text{H}$  and  $^{13}\text{C}$  NMR spectra of (*E*)-*N*-(4-methoxybenzyl)-4-(2-(oxazol-5-yl)vinyl)aniline (*trans*-4)
- Figure S4.**  $^1\text{H}$  and  $^{13}\text{C}$  NMR spectra of (*E*)-*N*-(4-chlorobenzyl)-4-(2-(oxazol-5-yl)vinyl)aniline (*trans*-5)
- Figure S5.**  $^1\text{H}$  and  $^{13}\text{C}$  NMR spectra of (*E*)-*N*-(4-fluorobenzyl)-4-(2-(oxazol-5-yl)vinyl)aniline (*trans*-6)
- Figure S6.**  $^1\text{H}$  and  $^{13}\text{C}$  NMR spectra of (*E*)-*N*-(3-methylbenzyl)-4-(2-(oxazol-5-yl)vinyl)aniline (*trans*-7)
- Figure S7.** COSY spectra of (*E*)-*N*-(3-methylbenzyl)-4-(2-(oxazol-5-yl)vinyl)aniline (*trans*-7)
- Figure S8.** HETCOR spectra of (*E*)-*N*-(3-methylbenzyl)-4-(2-(oxazol-5-yl)vinyl)aniline (*trans*-7)
- Figure S9.** NOESY spectra of (*E*)-*N*-(3-methylbenzyl)-4-(2-(oxazol-5-yl)vinyl)aniline (*trans*-7)
- Figure S10.**  $^1\text{H}$  and  $^{13}\text{C}$  NMR spectra of (*E*)-*N*-(3-methoxybenzyl)-4-(2-(oxazol-5-yl)vinyl)aniline (*trans*-8)
- Figure S11.**  $^1\text{H}$  and  $^{13}\text{C}$  NMR spectra of (*E*)-*N*-(3-chlorobenzyl)-4-(2-(oxazol-5-yl)vinyl)aniline (*trans*-9)
- Figure S12.**  $^1\text{H}$  and  $^{13}\text{C}$  NMR spectra of (*E*)-*N*-(3-fluorobenzyl)-4-(2-(oxazol-5-yl)vinyl)aniline (*trans*-10)
- Figure S13.**  $^1\text{H}$  and  $^{13}\text{C}$  NMR spectra of (*E*)-*N*-(2-methylbenzyl)-4-(2-(oxazol-5-yl)vinyl)aniline (*trans*-11)
- Figure S14.**  $^1\text{H}$  and  $^{13}\text{C}$  NMR spectra of (*E*)-*N*-(2-methoxybenzyl)-4-(2-(oxazol-5-yl)vinyl)aniline (*trans*-12)
- Figure S15.**  $^1\text{H}$  and  $^{13}\text{C}$  NMR spectra of (*E*)-*N*-(2-fluorobenzyl)-4-(2-(oxazol-5-yl)vinyl)aniline (*trans*-14)
- Figure S16.**  $^1\text{H}$  and  $^{13}\text{C}$  NMR spectra of (*E*)-*N*-(furan-2-ylmethyl)-4-(2-(oxazol-5-yl)vinyl)aniline (*trans*-17)
- Figure S17.**  $^1\text{H}$  and  $^{13}\text{C}$  NMR spectra of *N*-benzyl naphtho[1,2-*d*]oxazol-8-amine (**19**)
- Figure S18.**  $^1\text{H}$  and  $^{13}\text{C}$  NMR spectra of *N*-(4-fluorobenzyl)naphtho[1,2-*d*]oxazol-8-amine (**20**)
- Figure S19.**  $^1\text{H}$  NMR spectrum of *N*-(thiophen-2-ylmethyl)naphtho[1,2-*d*]oxazol-8-amine (**21**)
- Figure S20.** Acetylcholinesterase inhibition by *trans*-amino-5-arylethenyl-oxazole derivatives.



Supplemental Material

Šagud et al. Design, synthesis and cholinesterase inhibitory properties of new oxazole benzylamine derivatives, Journal of Enzyme Inhibition and Medicinal Chemistry, 2019

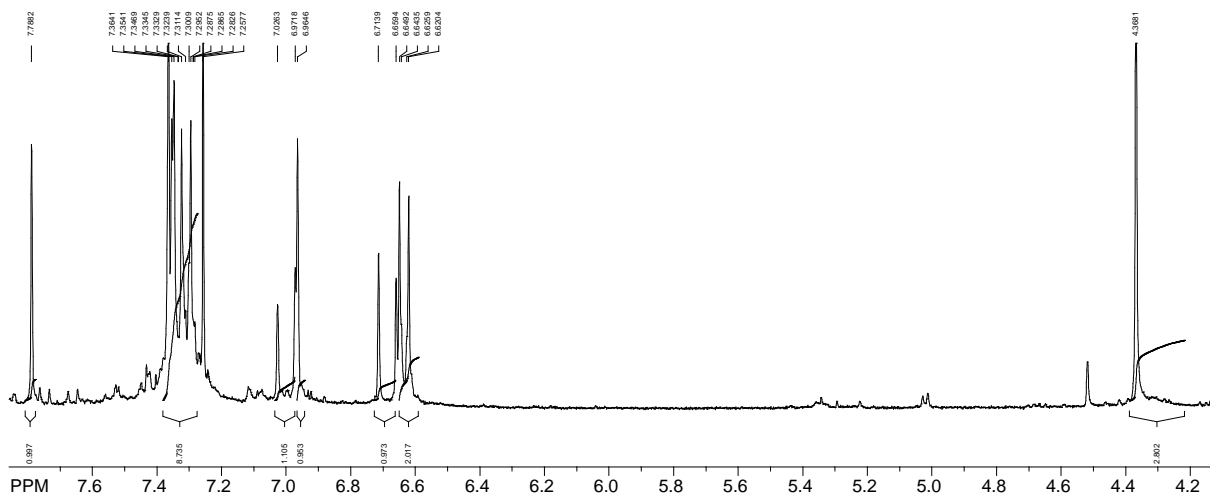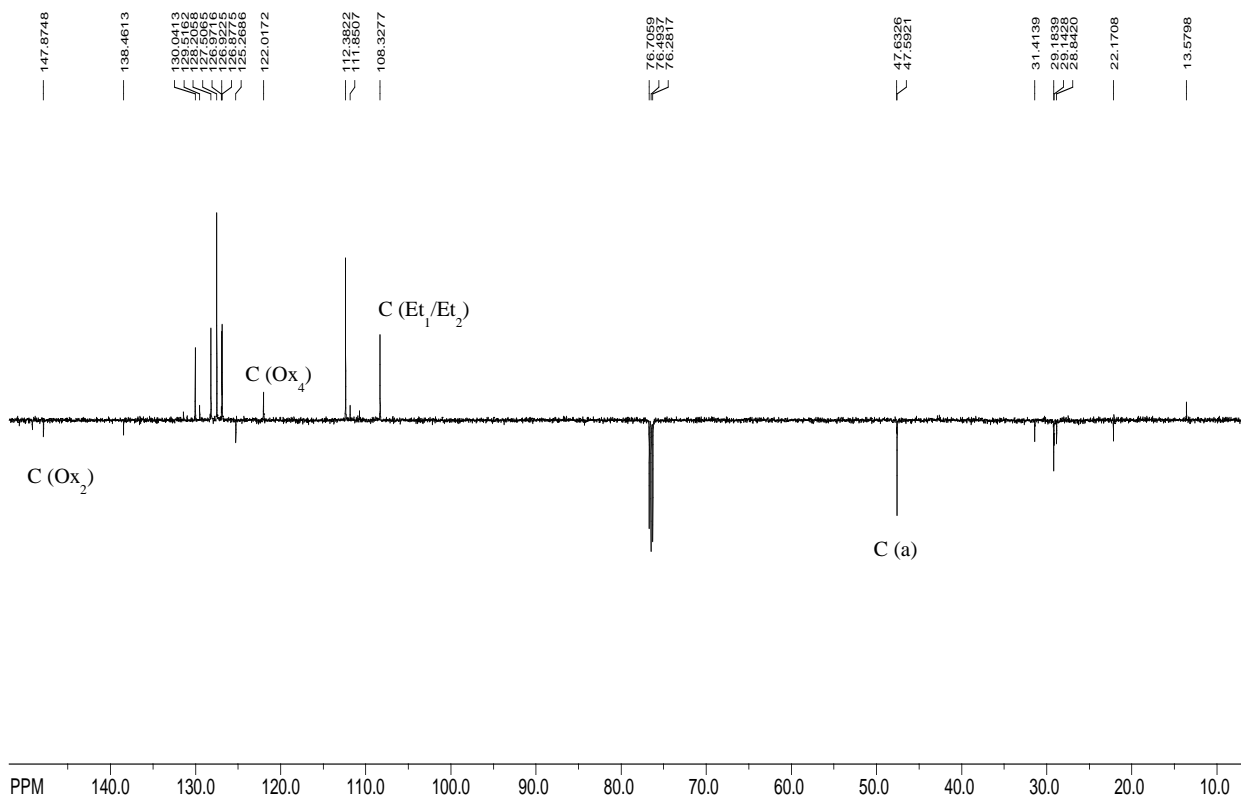

**Figure S2.**  $^1\text{H}$  and  $^{13}\text{C}$  NMR spectra of (*E*)-*N*-(4-methylbenzyl)-4-(2-(oxazol-5-yl)vinyl)aniline (*trans*-3)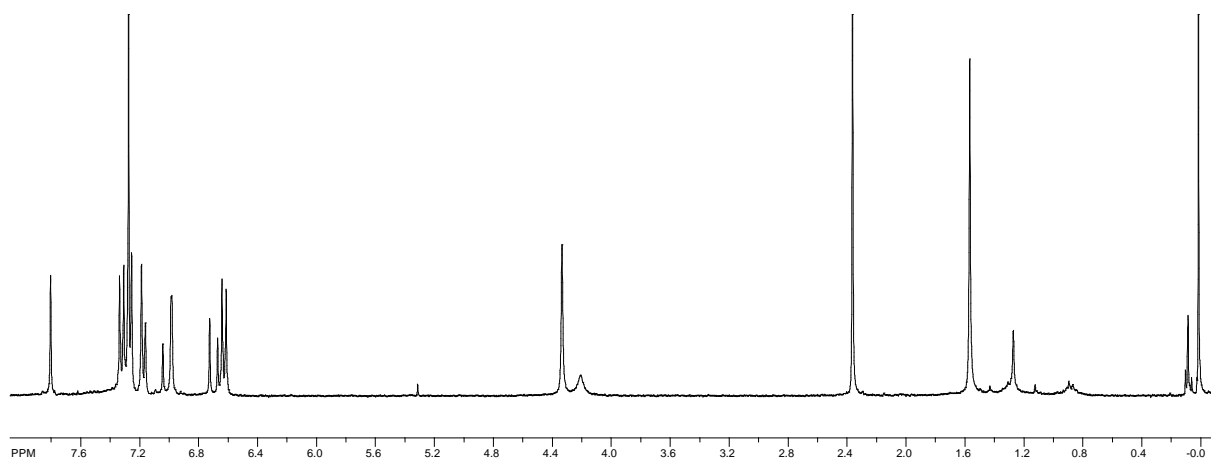

file: C:\Users\lneral\Desktop\GURADNUE\ZRNKA KOVARIKJ Enzyme Inhibition and Medicinal Chemistry\papa hoda NMR\JH 45 4-10 dMe istifid exp1\_cq30-  
transmitter freq.: 300.132701 MHz  
time domain size: 32768 points  
width: 6172.84 Hz = 20.567034 ppm = 0.188380 Hzpt  
number of scans: 21

freq. of 0 ppm: 300.130002 MHz  
processed size: 32768 complex points  
LB: 0.000 GB: 0.0000

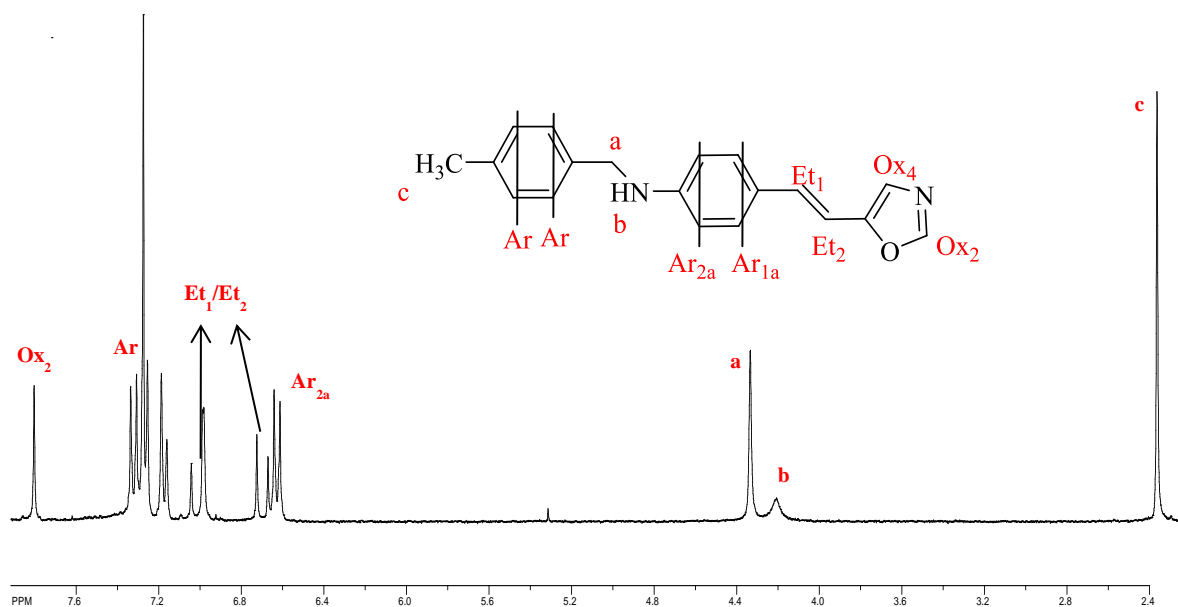

Supplemental Material

Šagud et al. Design, synthesis and cholinesterase inhibitory properties of new oxazole derivatives, Journal of Enzyme Inhibition and Medicinal Chemistry, 2019

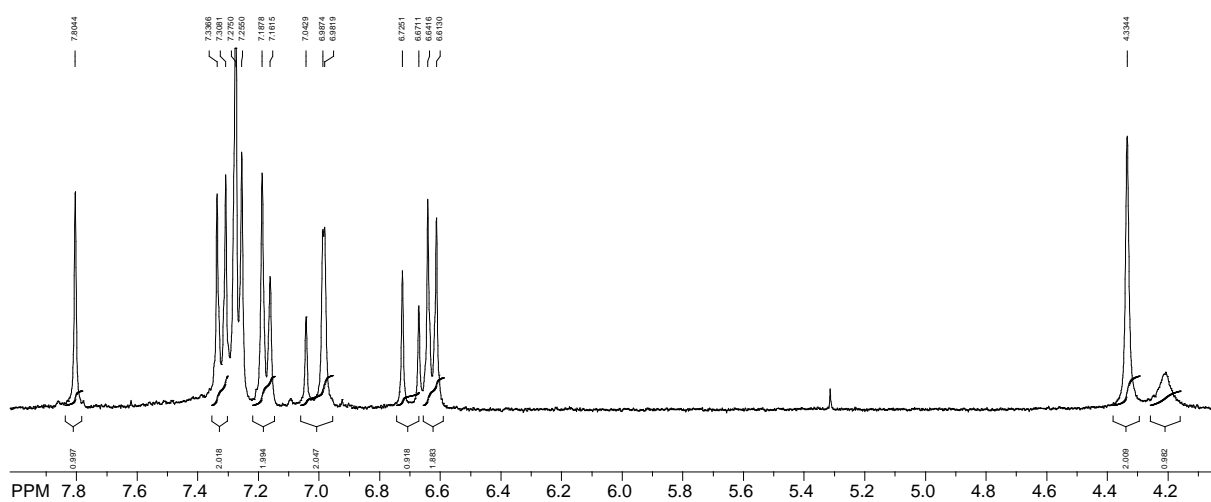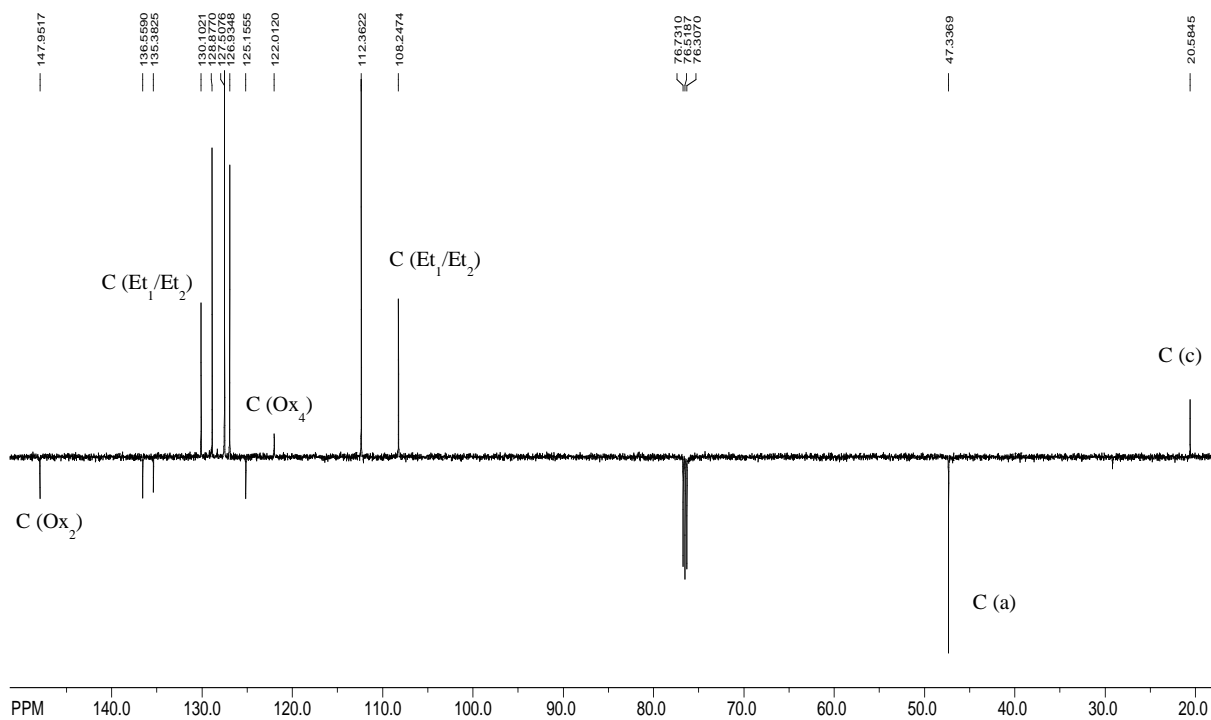

**Figure S3.**  $^1\text{H}$  and  $^{13}\text{C}$  NMR spectra of (*E*)-*N*-(4-methoxybenzyl)-4-(2-(oxazol-5-yl)vinyl)aniline (*trans*-4)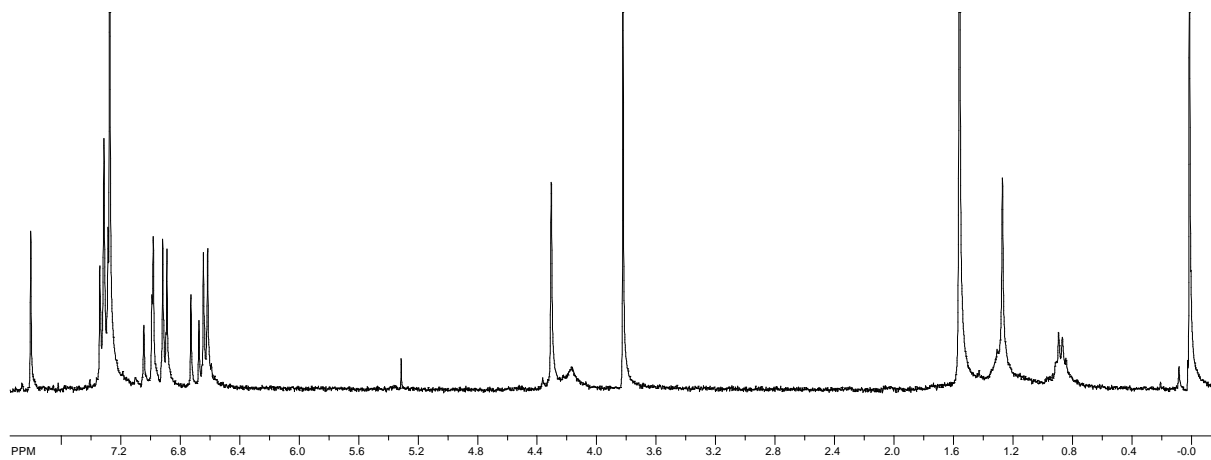

file: C:\Users\lneral\Desktop\GURADNUEZ\ZRNKA KOVARIKJ Enzyme Inhibition and Medicinal Chemistry\pajpa hodak NMR\JH 44 3-9 etalifid expr -cag30  
transmitter freq.: 300.132701 MHz  
time domain size: 32768 points  
width: 6172.84 Hz = 20.567034 ppm = 0.188380 Hz/pt  
number of scans: 20

freq. of 0 ppm: 300.130002 MHz  
processed size: 32768 complex points  
LB: 0.000 GB: 0.0000

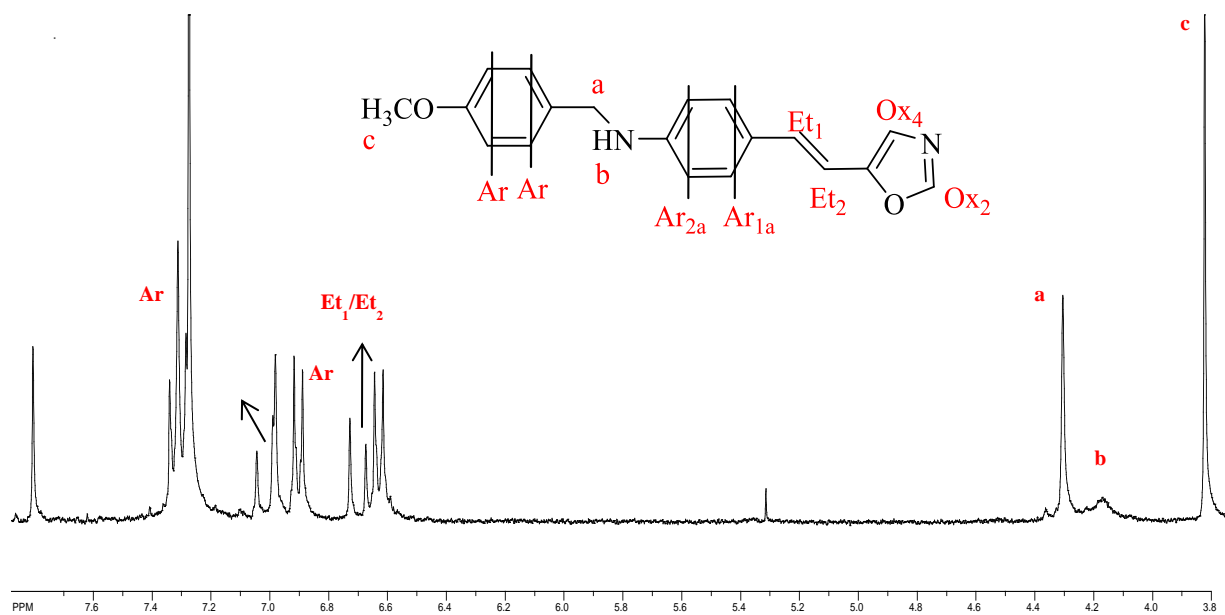

Supplemental Material

Šagud et al. Design, synthesis and cholinesterase inhibitory properties of new oxazole benzylamine derivatives, Journal of Enzyme Inhibition and Medicinal Chemistry, 2019

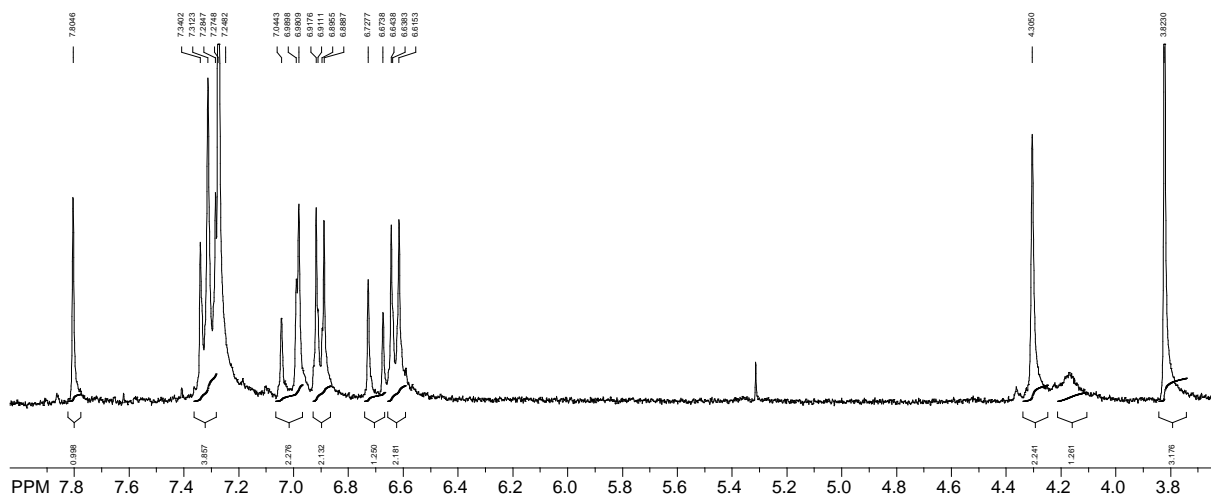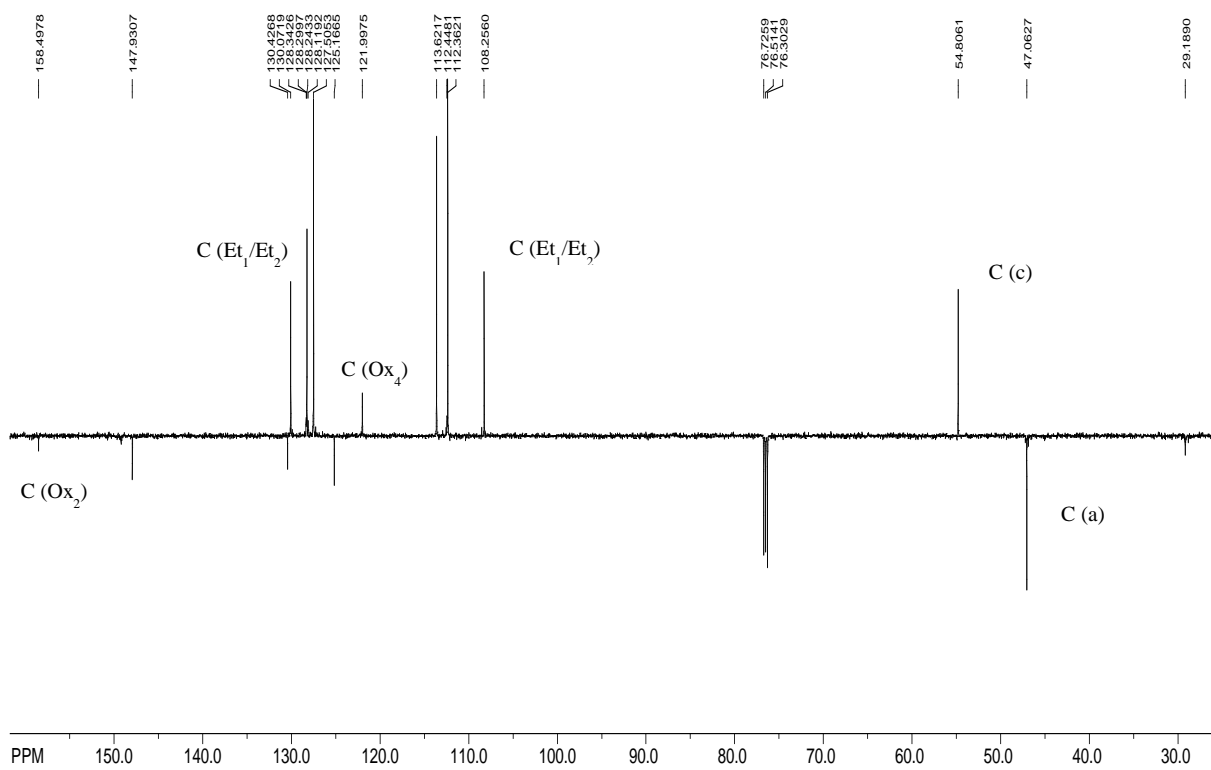



**Figure S4.**  $^1\text{H}$  and  $^{13}\text{C}$  NMR spectra of (*E*)-*N*-(4-chlorobenzyl)-4-(2-(oxazol-5-yl)vinyl)aniline (*trans*-5)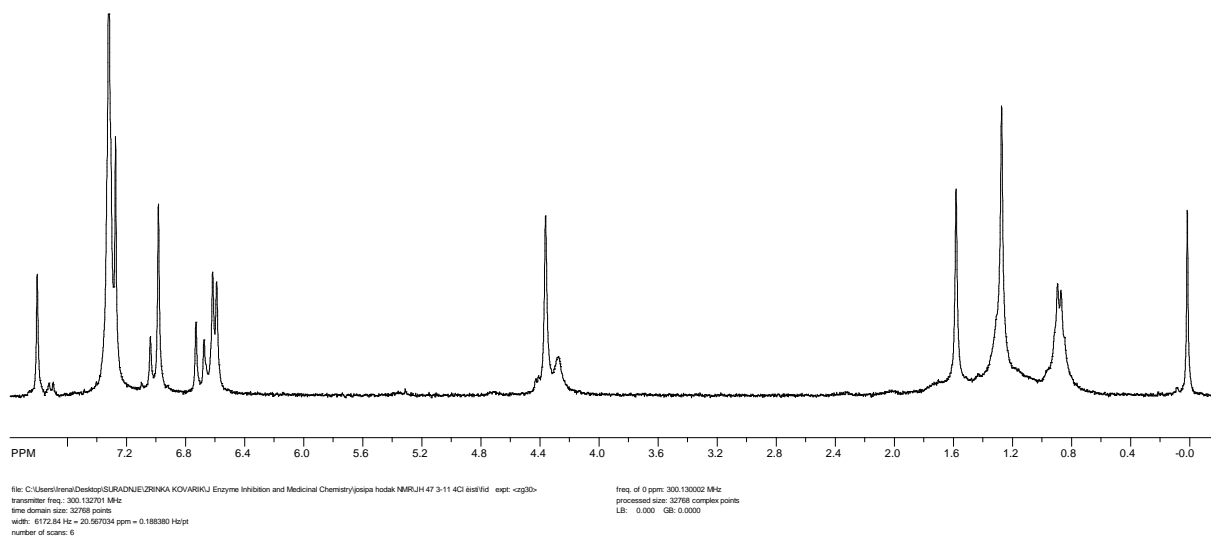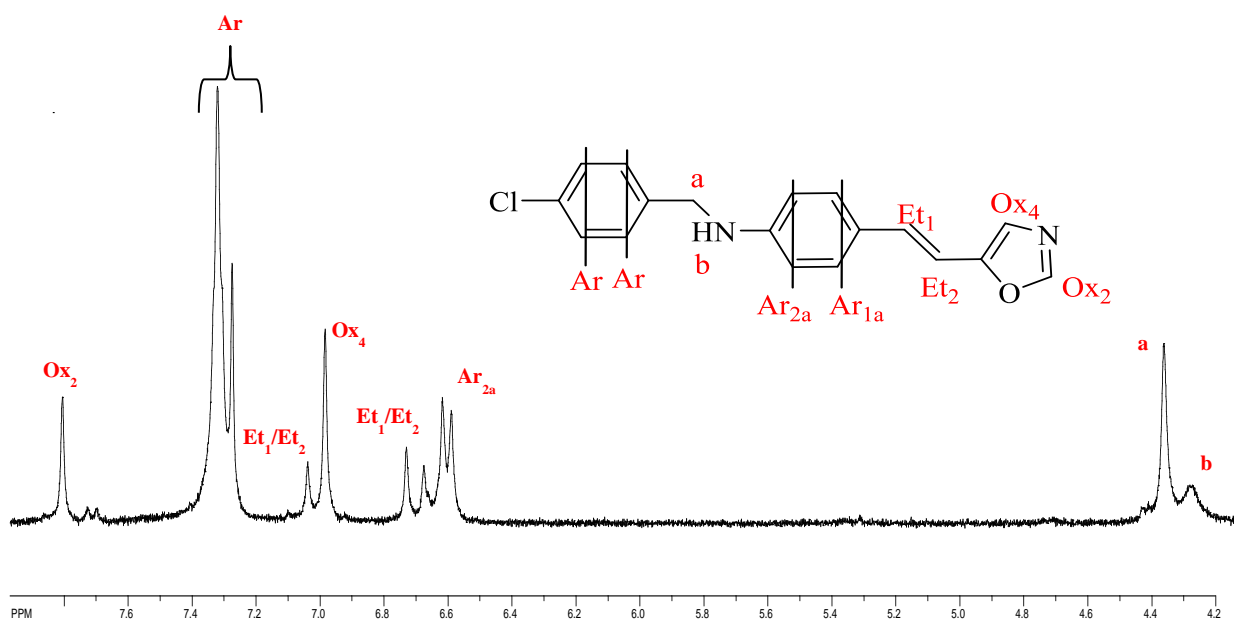

Supplemental Material

Šagud et al. Design, synthesis and cholinesterase inhibitory properties of new oxazole benzylamine derivatives, Journal of Enzyme Inhibition and Medicinal Chemistry, 2019

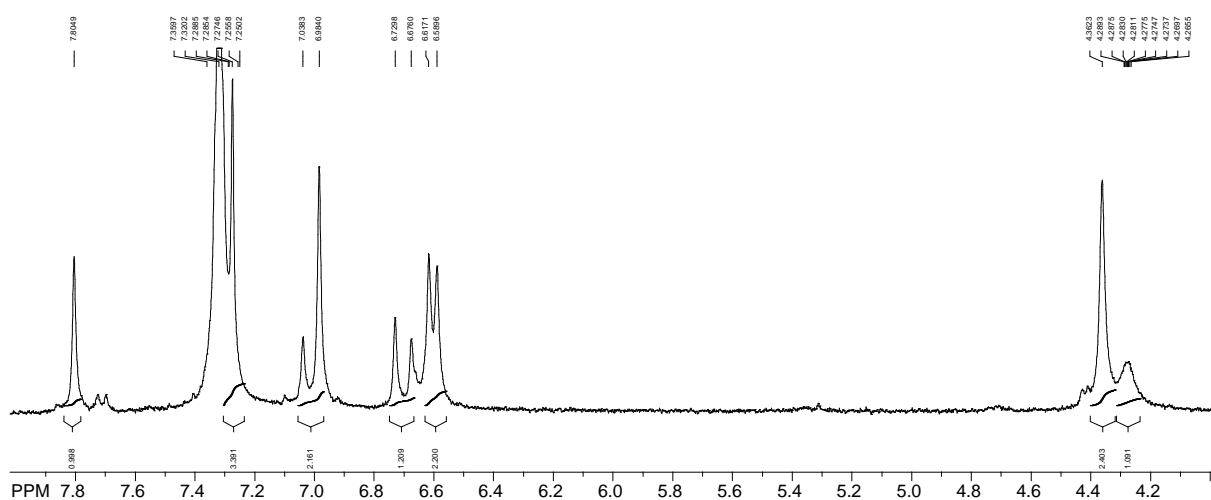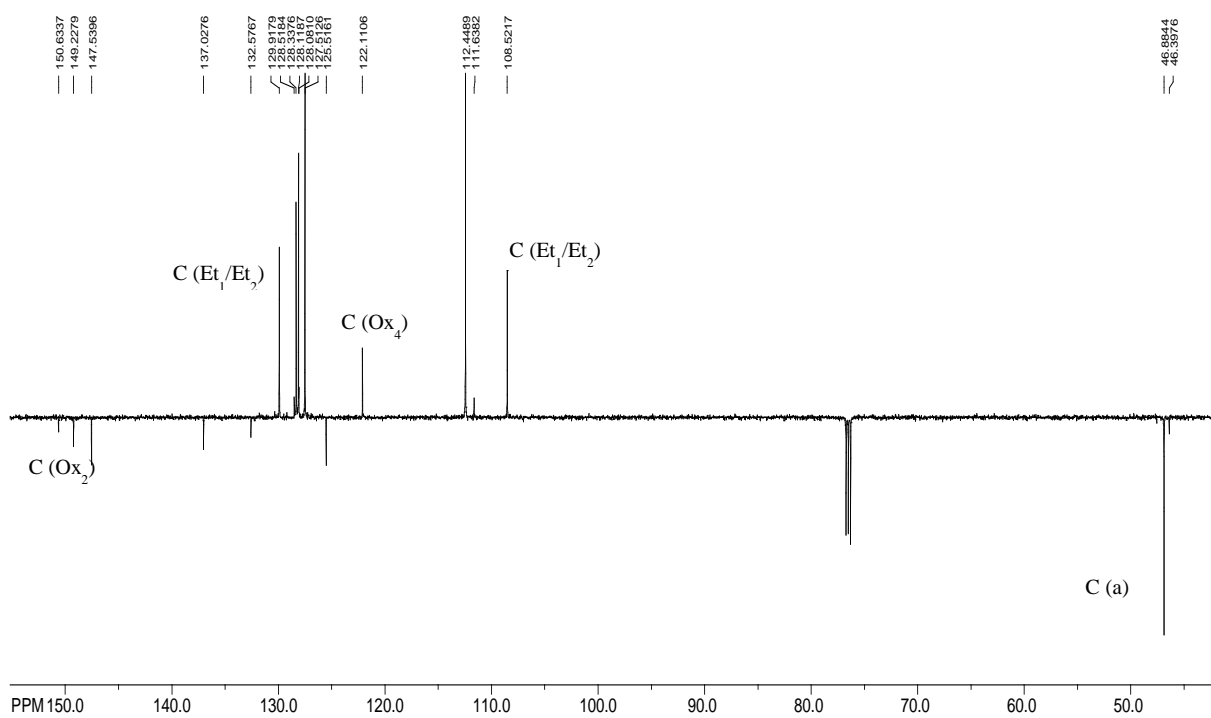

**Figure S5.**  $^1\text{H}$  and  $^{13}\text{C}$  NMR spectra of (*E*)-*N*-(4-fluorobenzyl)-4-(2-(oxazol-5-yl)vinyl)aniline (*trans*-6)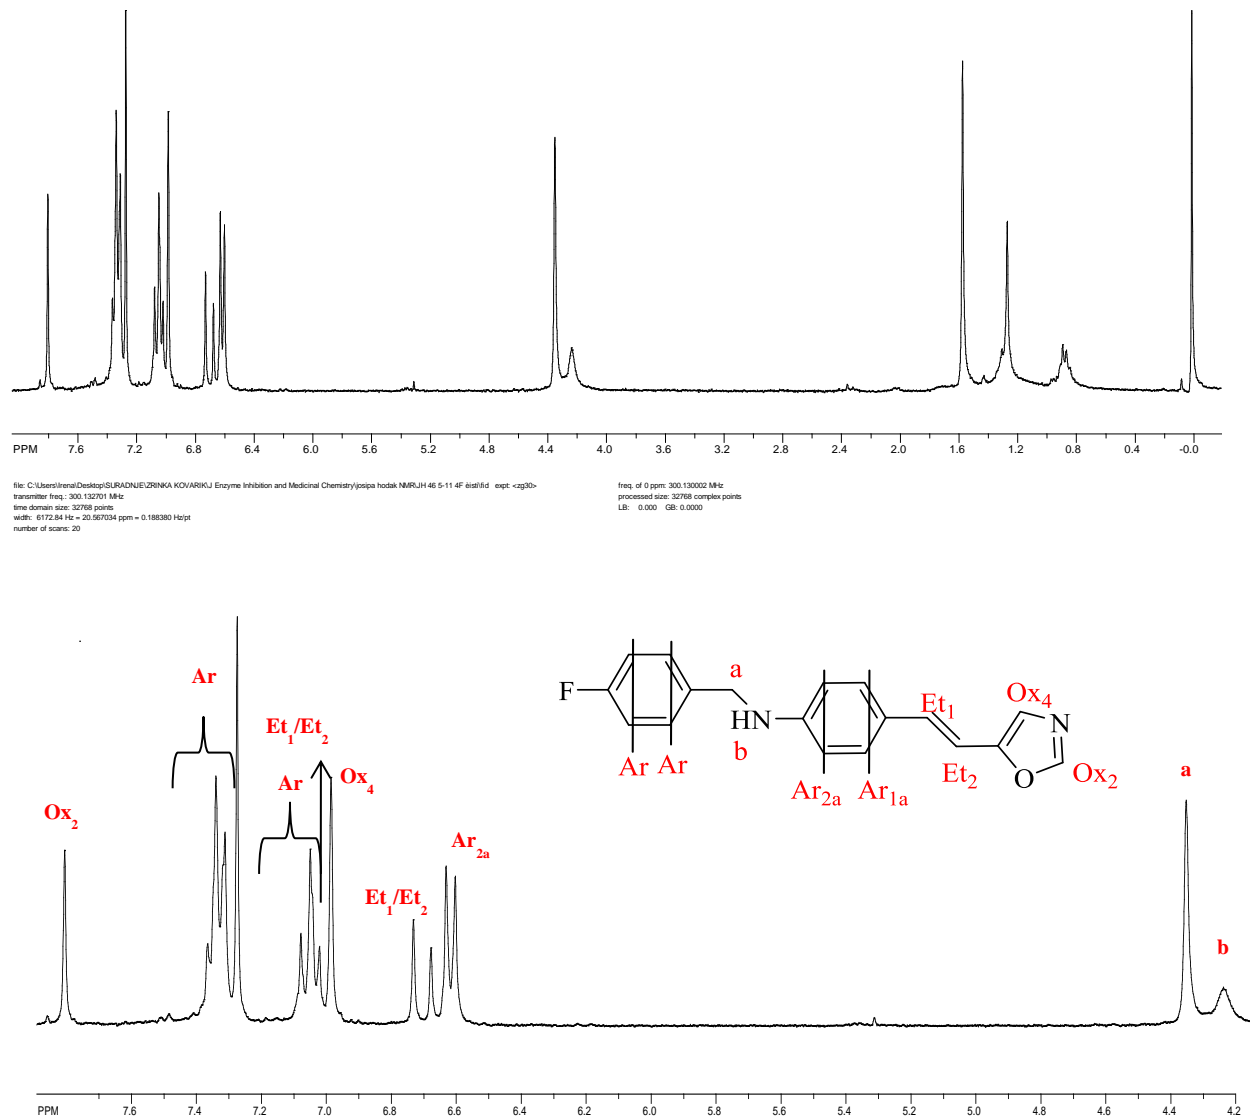

Supplemental Material

Šagud et al. Design, synthesis and cholinesterase inhibitory properties of new oxazole benzylamine derivatives, Journal of Enzyme Inhibition and Medicinal Chemistry, 2019

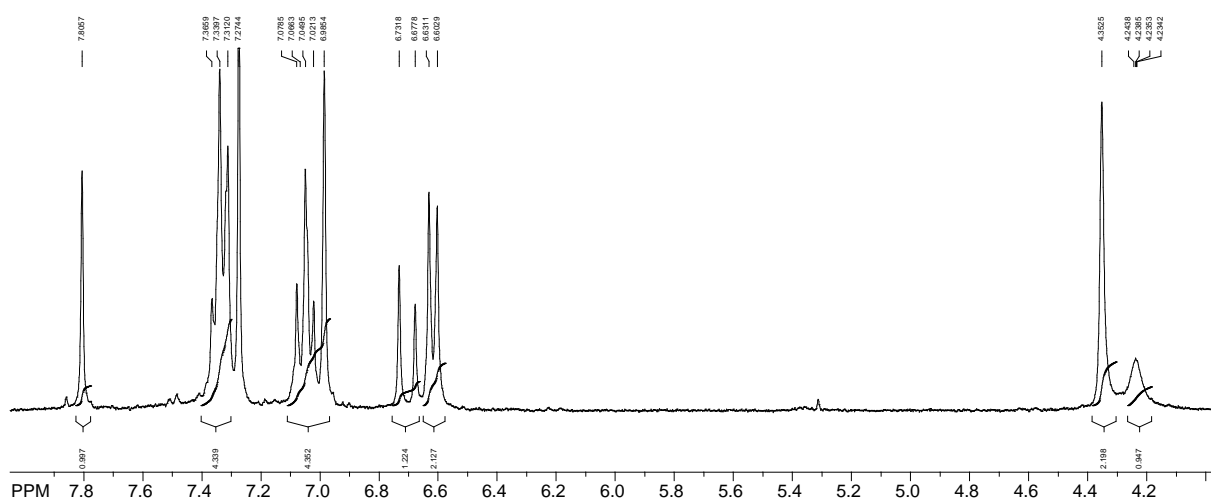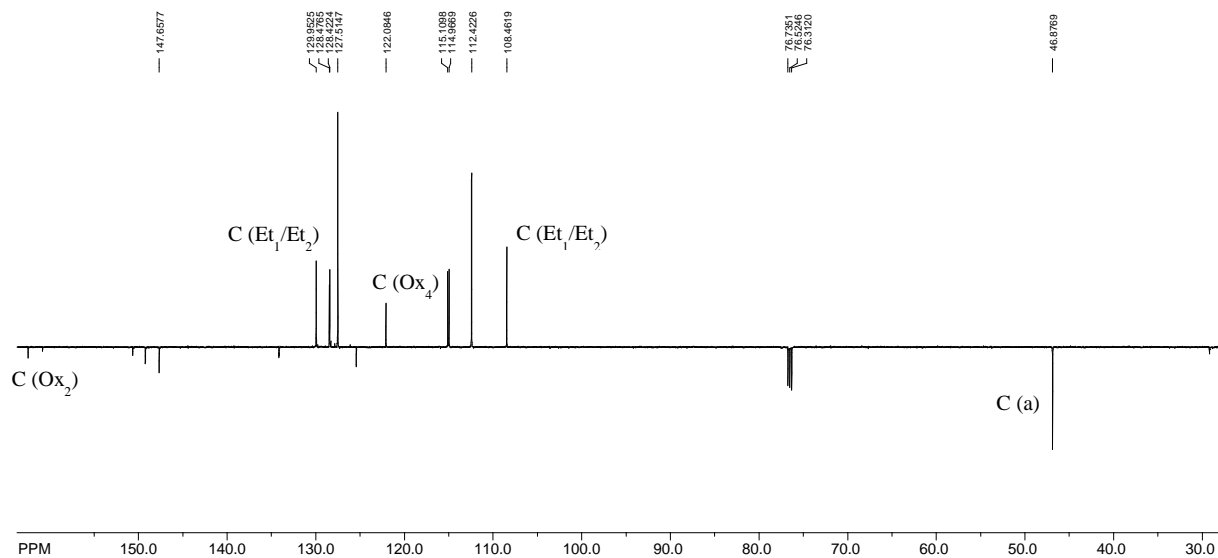

**Figure S6.**  $^1\text{H}$  and  $^{13}\text{C}$  NMR spectra of (*E*)-*N*-(3-methylbenzyl)-4-(2-(oxazol-5-yl)vinyl)aniline (*trans*-7)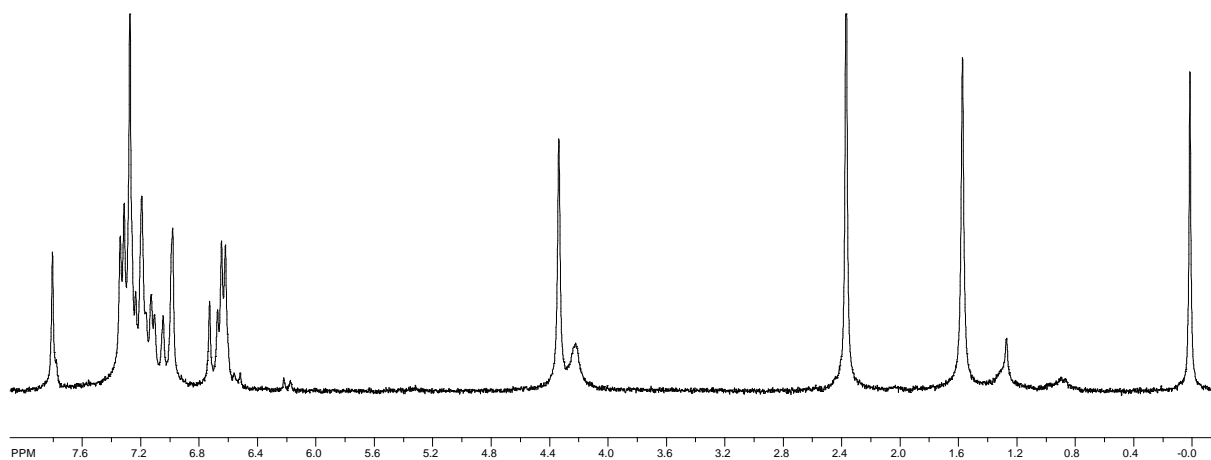

file: C:\Users\lneal\Desktop\SURADNE\ZRNKA KOVARIKJ Enzyme Inhibition and Medicinal Chemistry\papa hodak NMR\H 50 4-5 3Me atalifd1 expt -cag30-  
transmitter freq: 300.132701 MHz  
time domain size: 32768 points  
width: 6172.84 Hz = 20.607024 ppm = 0.168380 Hzpp  
number of scans: 16

freq of 0 ppm: 300.130002 MHz  
processed size: 32768 complex points  
LB: 0.000 GB: 0.0000

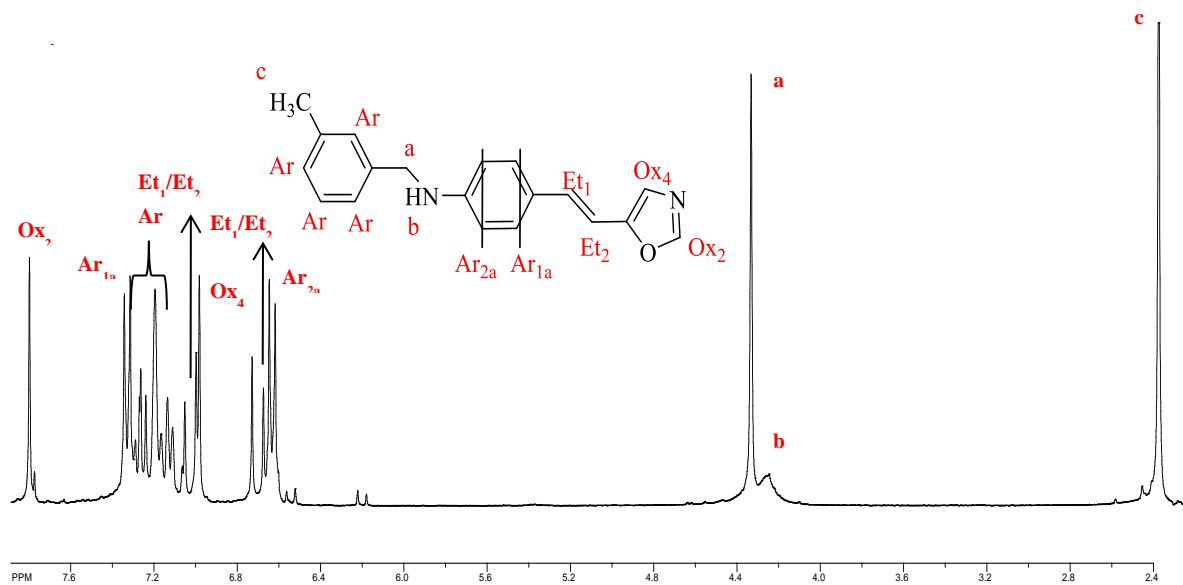

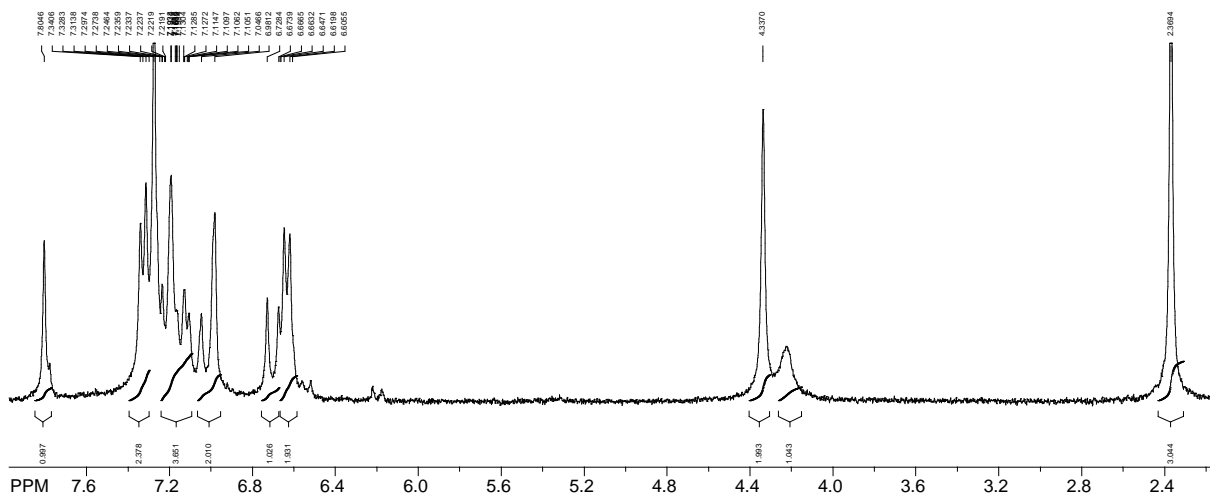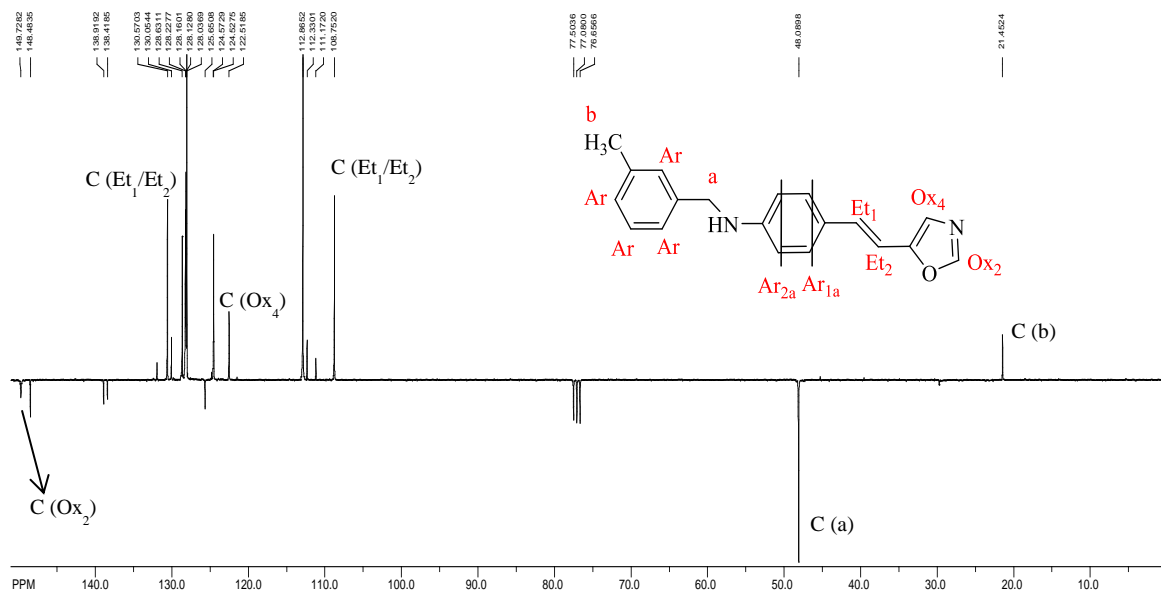

**Figure S7. COSY spectra of (*E*)-*N*-(3-methylbenzyl)-4-(2-(oxazol-5-yl)vinyl)aniline (*trans*-7)**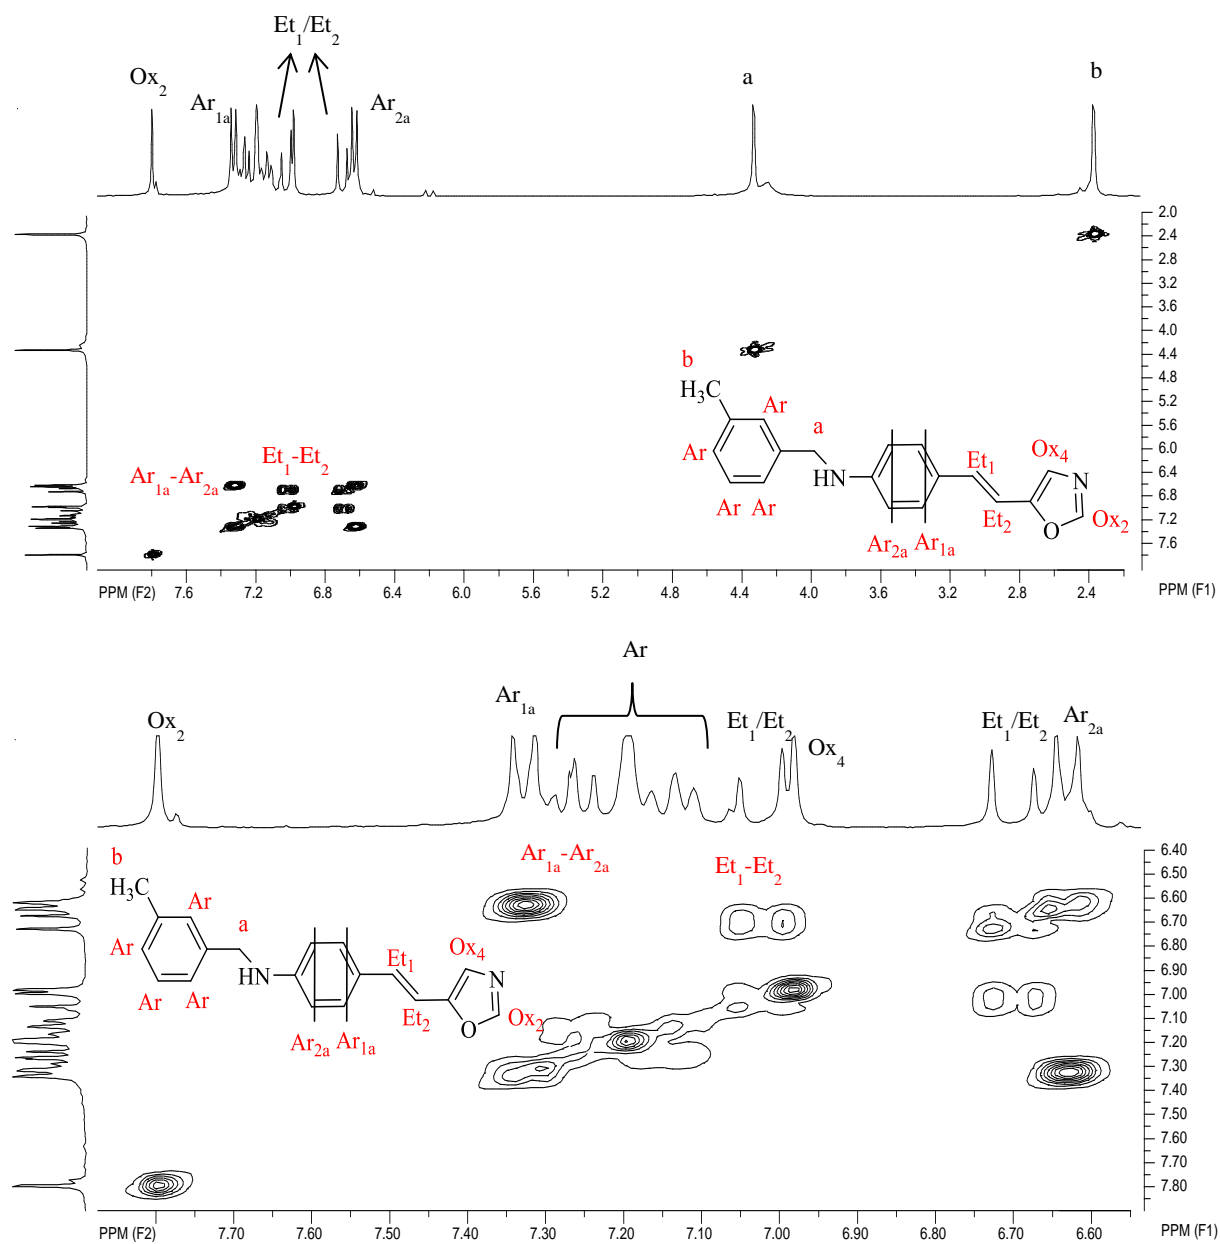

**Figure S8. HETCOR spectra of (*E*)-*N*-(3-methylbenzyl)-4-(2-(oxazol-5-yl)vinyl)aniline (*trans*-7)**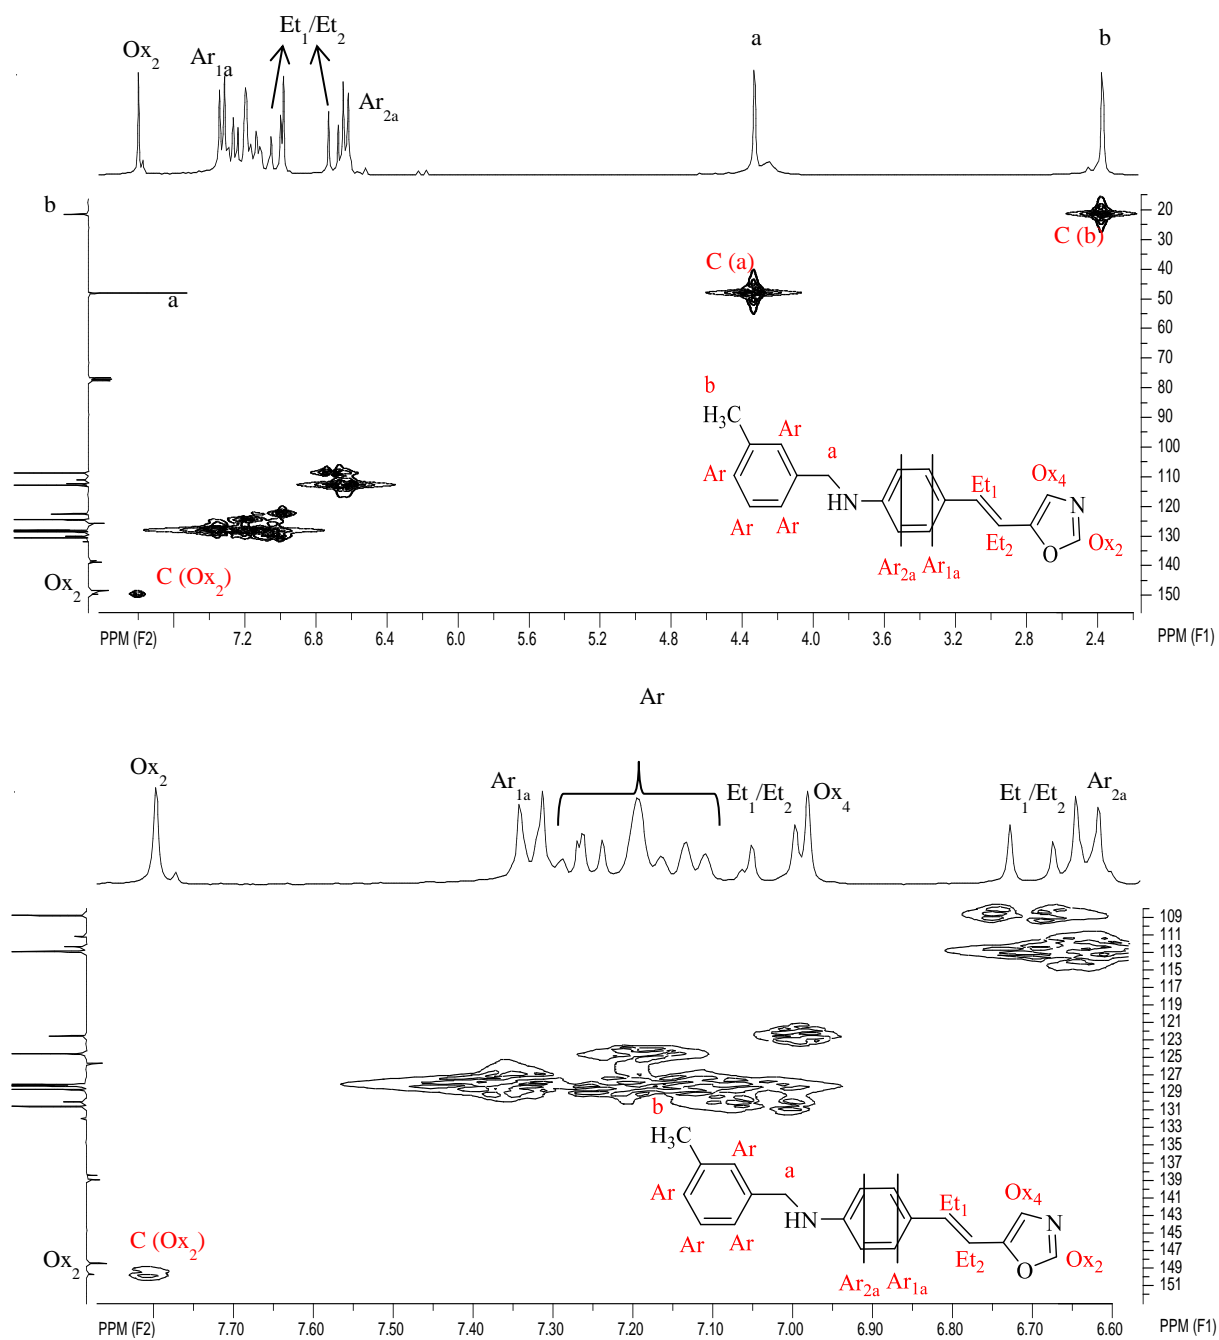



**Figure S9.** NOESY spectra of (*E*)-*N*-(3-methylbenzyl)-4-(2-(oxazol-5-yl)vinyl)aniline (*trans*-7)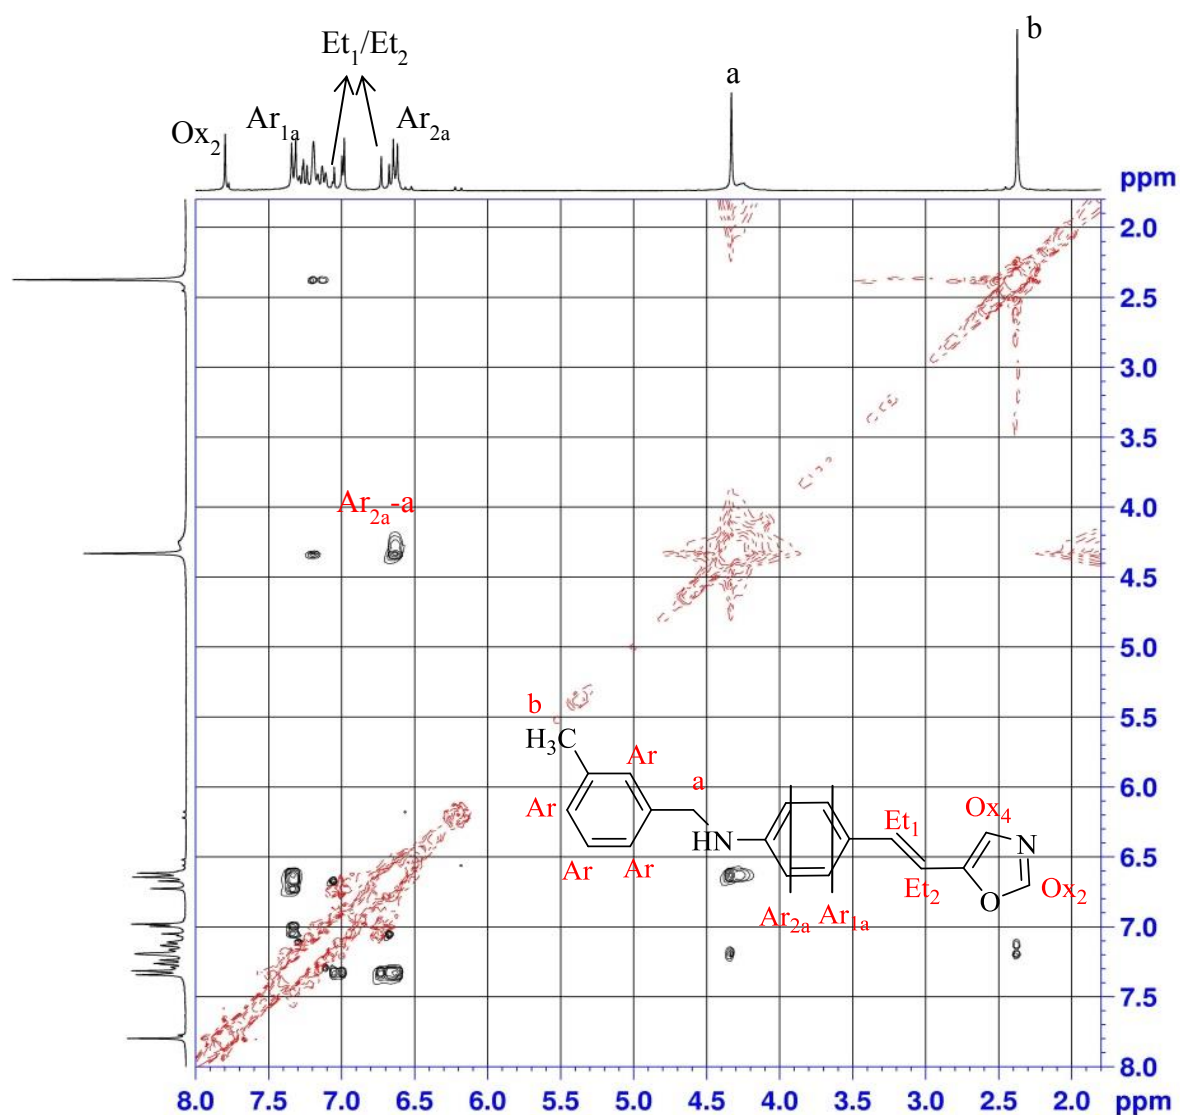

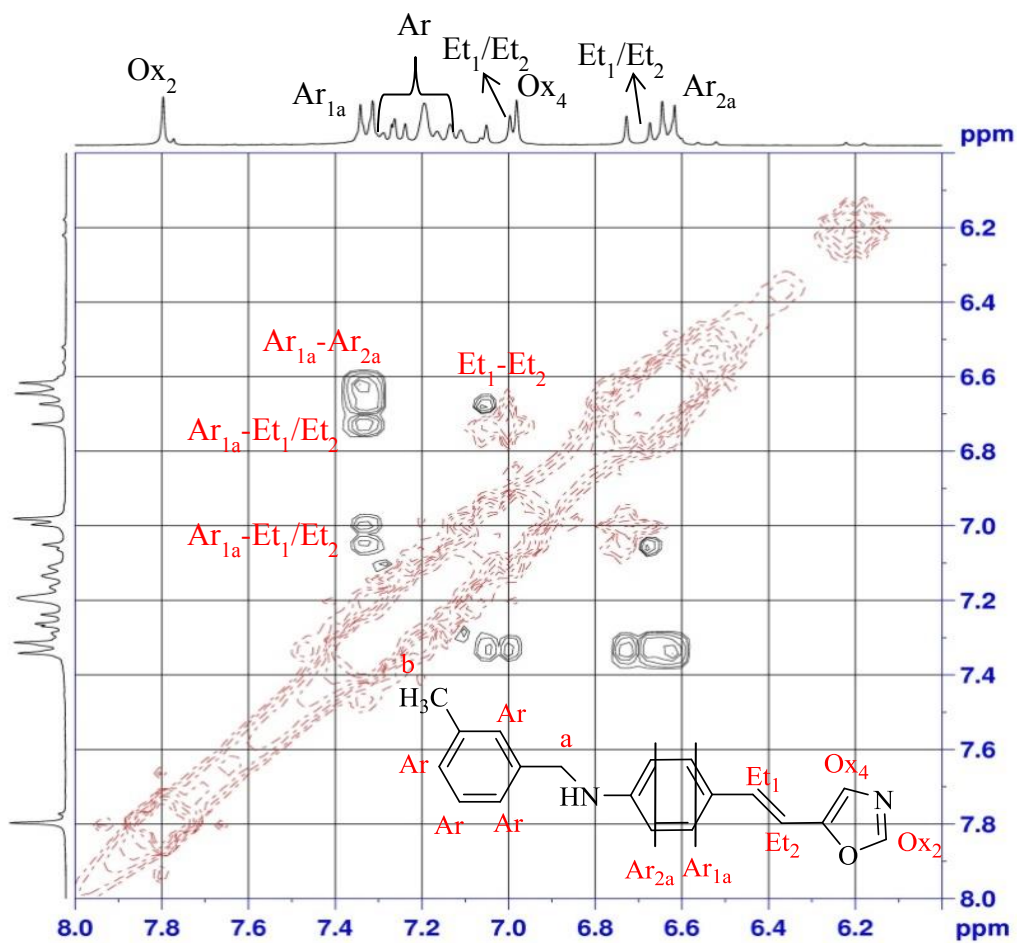

**Figure S10.**  $^1\text{H}$  and  $^{13}\text{C}$  NMR spectra of (*E*)-*N*-(3-methoxybenzyl)-4-(2-(oxazol-5-yl)vinyl)aniline (*trans*-8)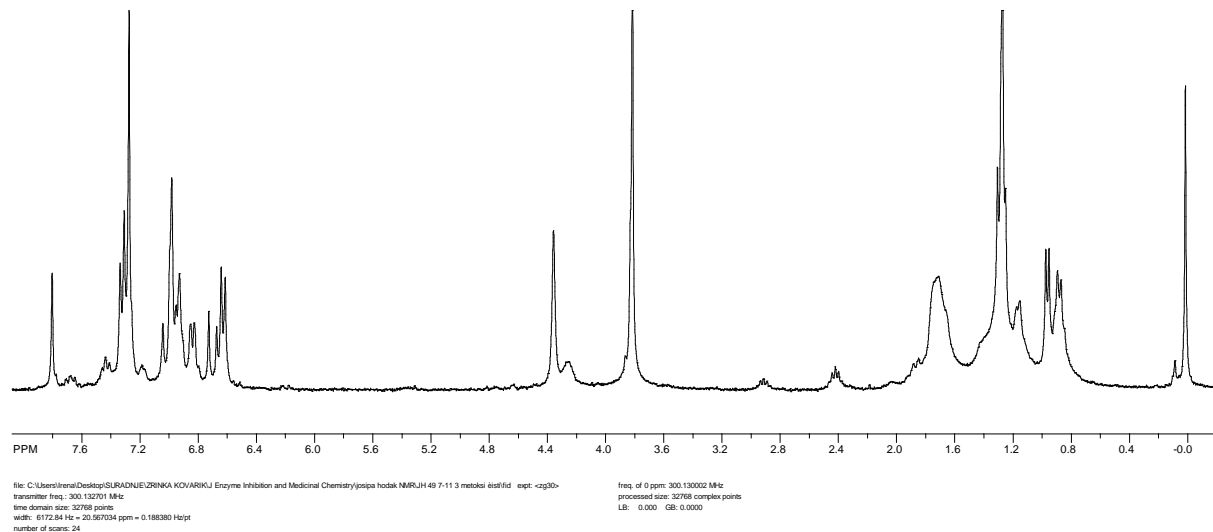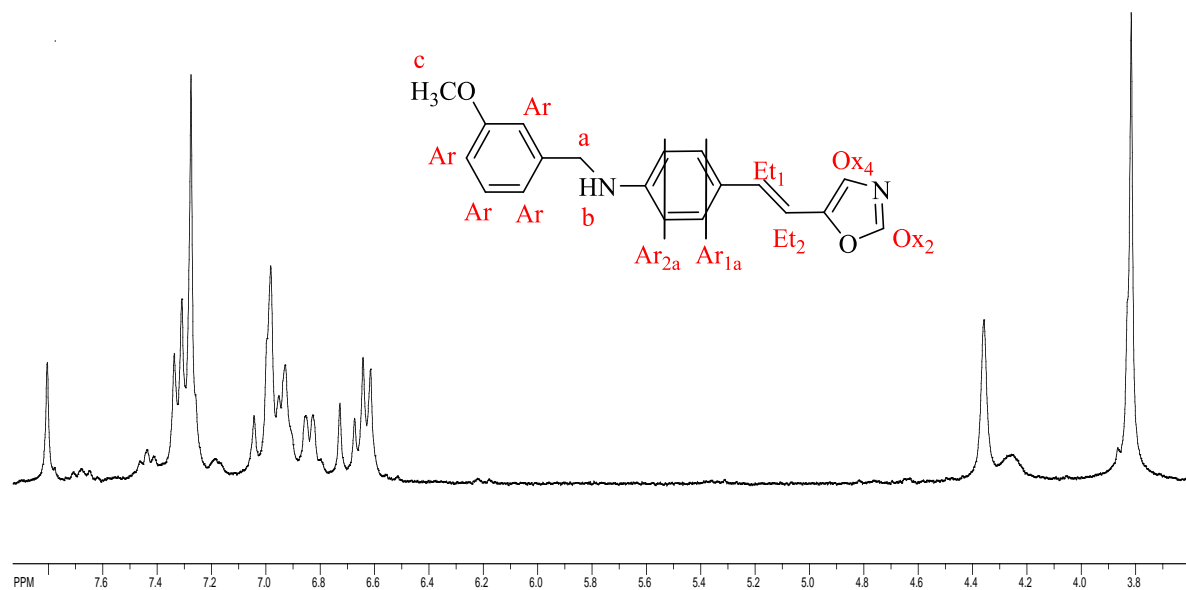

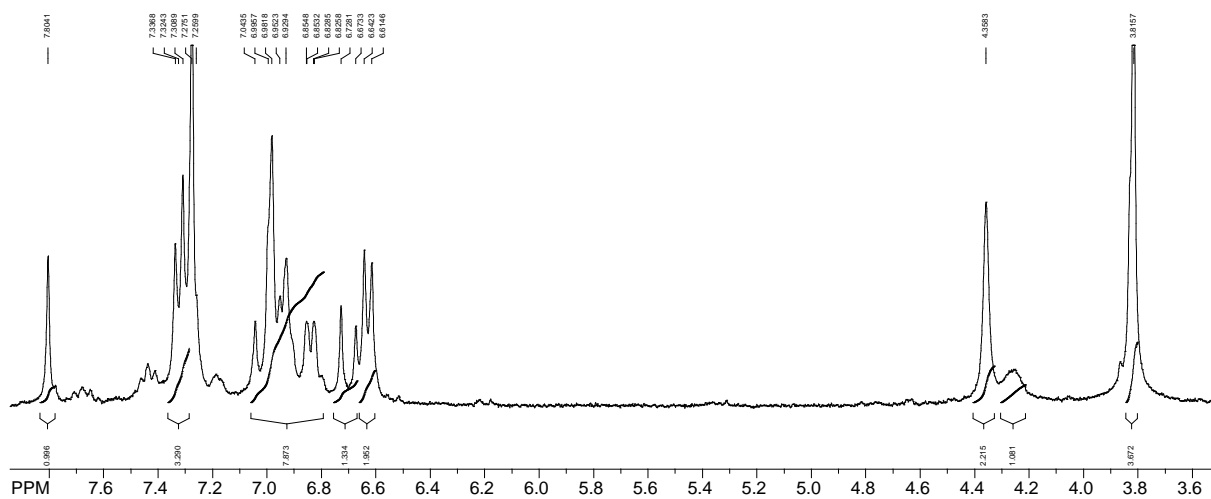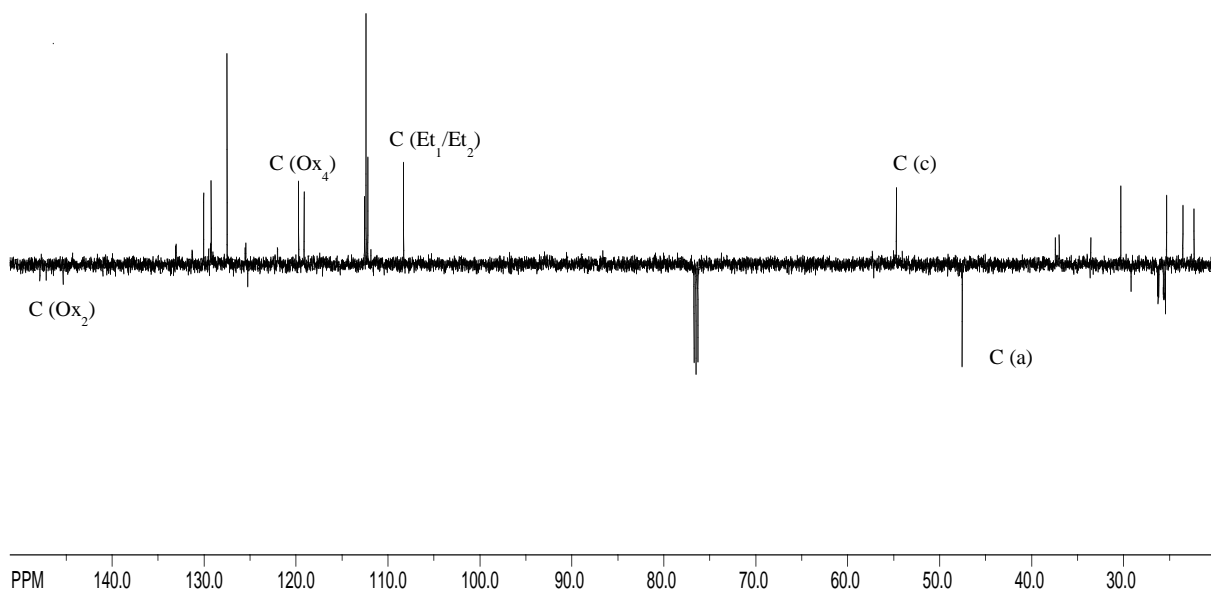

**Figure S11.**  $^1\text{H}$  and  $^{13}\text{C}$  NMR spectra of (*E*)-*N*-(3-chlorobenzyl)-4-(2-(oxazol-5-yl)vinyl)aniline (*trans*-9)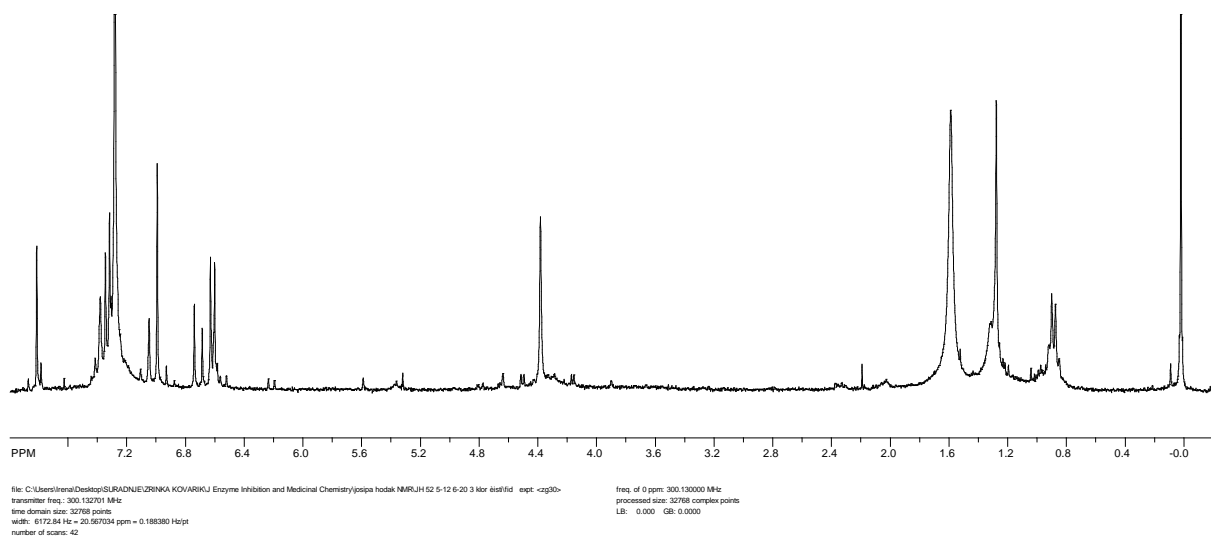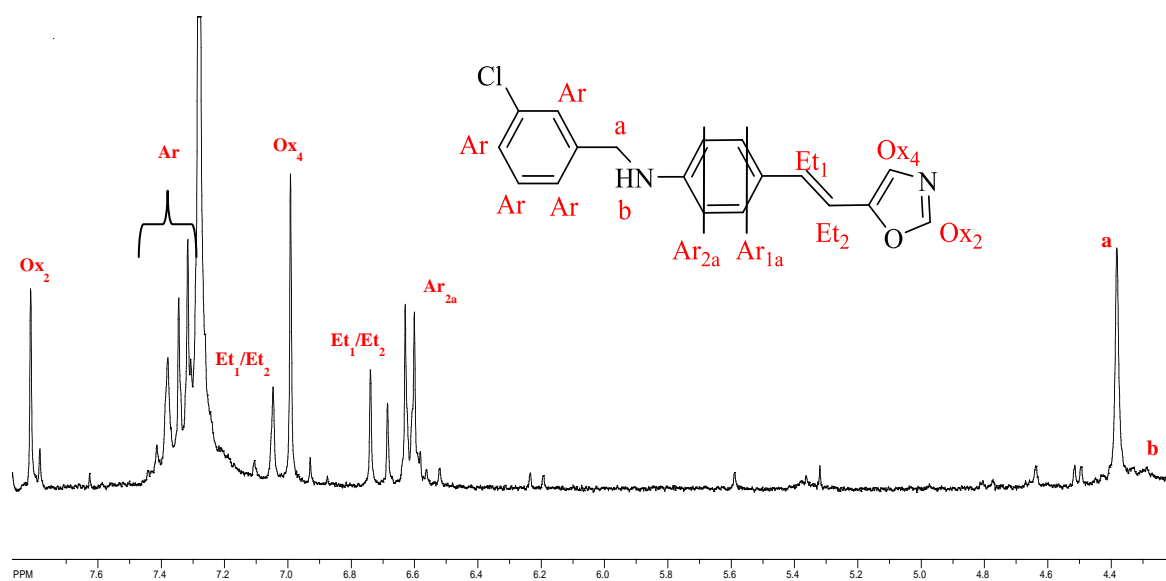

Supplemental Material

Şagud et al. Design, synthesis and cholinesterase inhibitory properties of new oxazole benzylamine derivatives, Journal of Enzyme Inhibition and Medicinal Chemistry, 2019

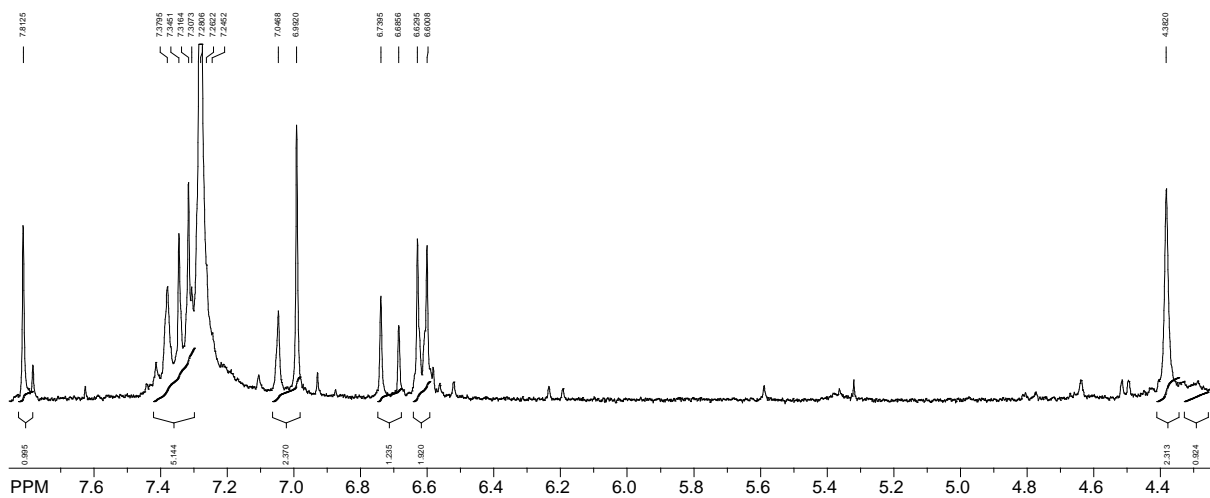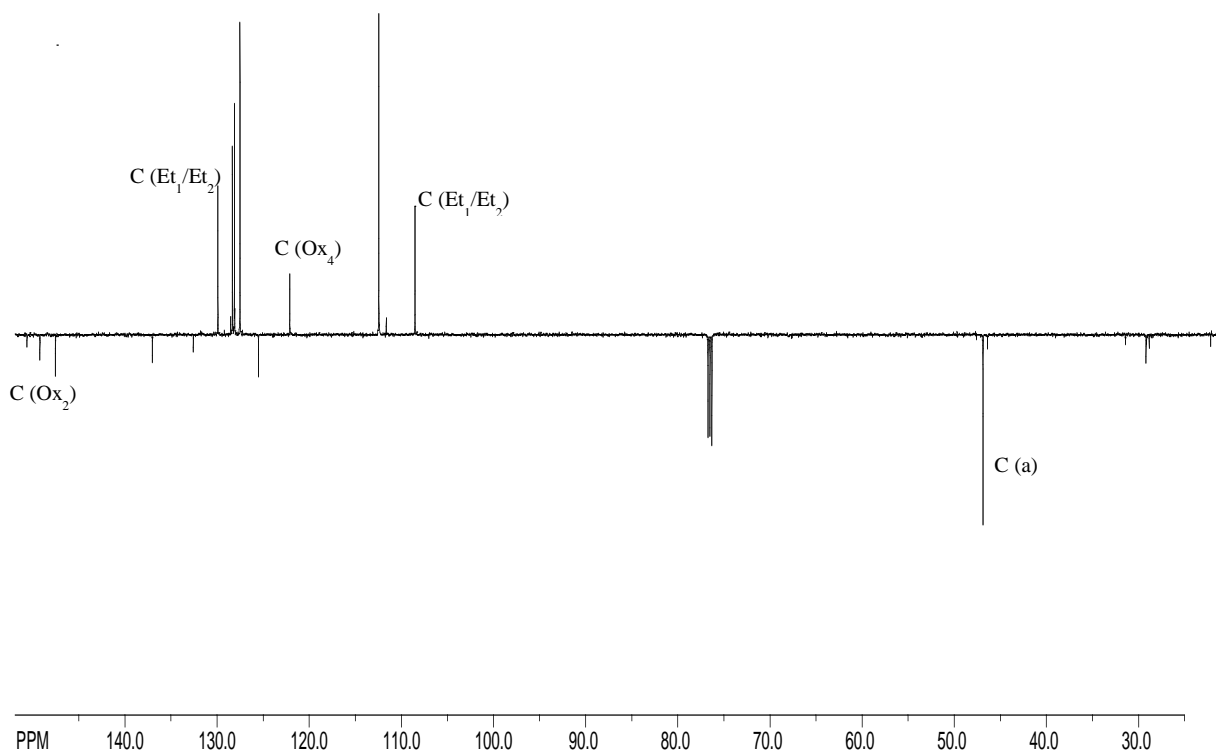

**Figure S12.**  $^1\text{H}$  and  $^{13}\text{C}$  NMR spectra of (*E*)-*N*-(3-fluorobenzyl)-4-(2-(oxazol-5-yl)vinyl)aniline (*trans*-10)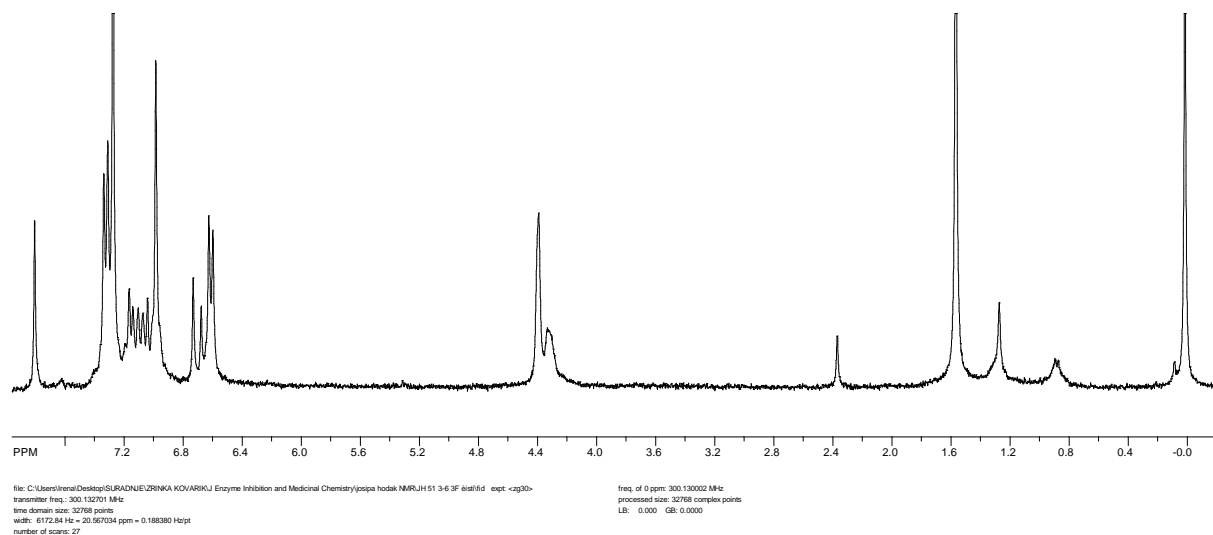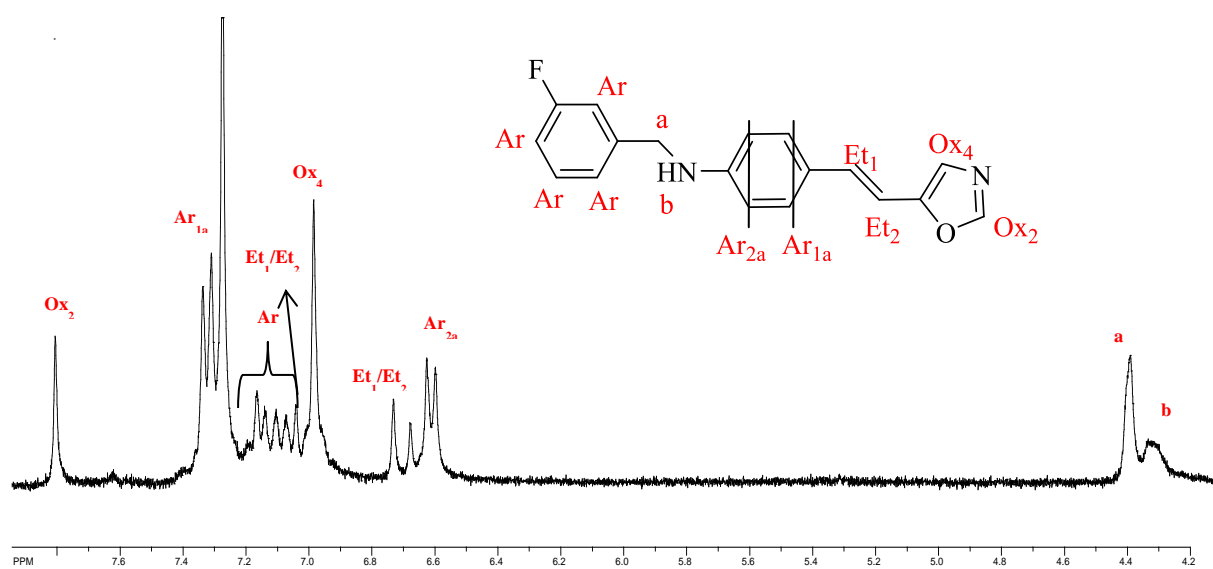

Supplemental Material

Šagud et al. Design, synthesis and cholinesterase inhibitory properties of new oxazole benzylamine derivatives, Journal of Enzyme Inhibition and Medicinal Chemistry, 2019

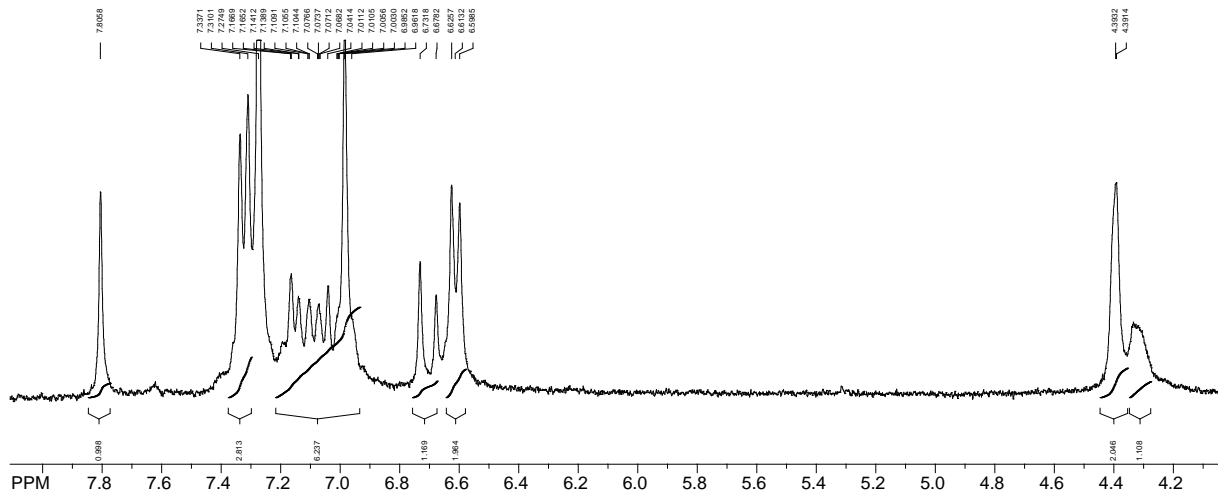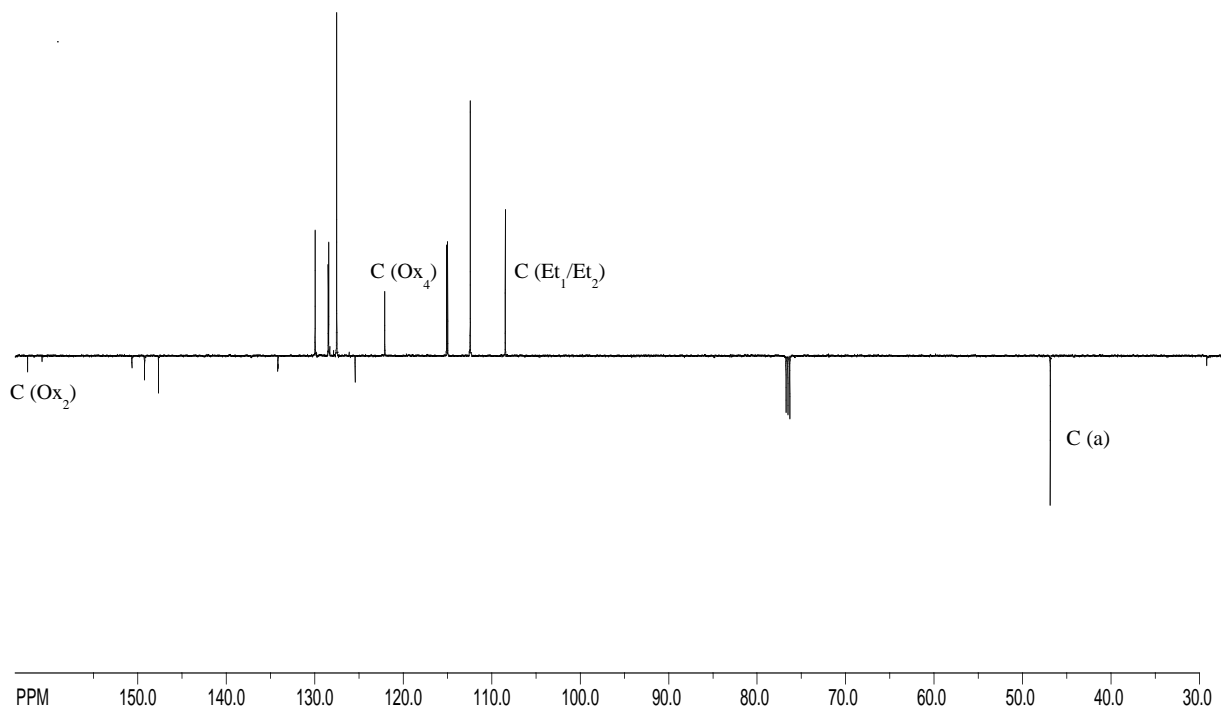



**Figure S13.**  $^1\text{H}$  and  $^{13}\text{C}$  NMR spectra of (*E*)-*N*-(2-methylbenzyl)-4-(2-(oxazol-5-yl)vinyl)aniline (*trans*-11)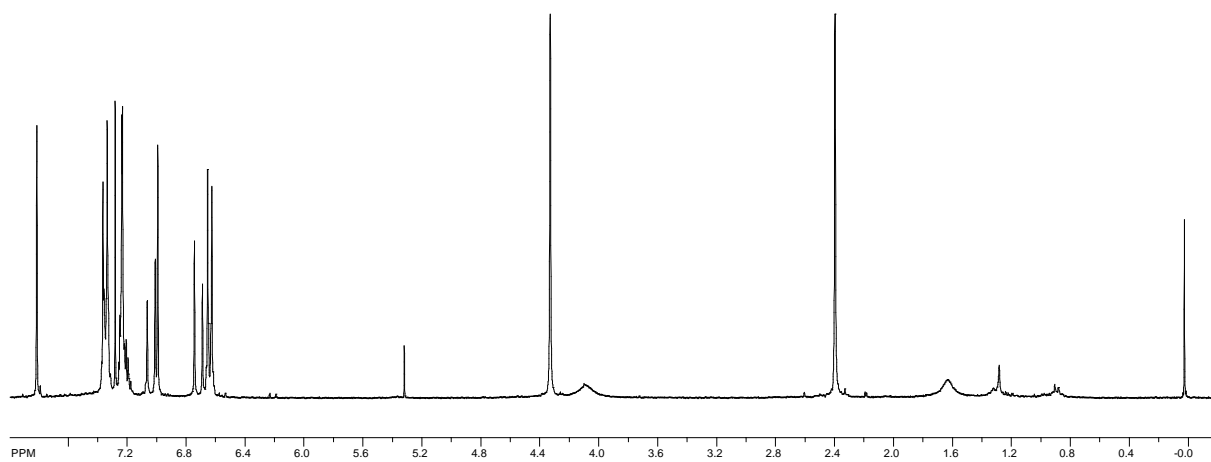

file: C:\Users\lneal\Desktop\SURADNE\ZRNKA KOVARIK\J Enzyme Inhibition and Medicinal Chemistry\papa hodak NMR\JH 54 3-4 2Me ecifid exp -c2g30-

freq. of 0 ppm: 300.130000 MHz  
transmitter freq.: 300.132701 MHz  
time domain size: 32768 points  
processed size: 32768 complex points  
width: 6172.86 Hz = 20.567024 ppm = 0.168380 Hzpp  
number of scans: 13  
LB: 0.000 GB: 0.0000

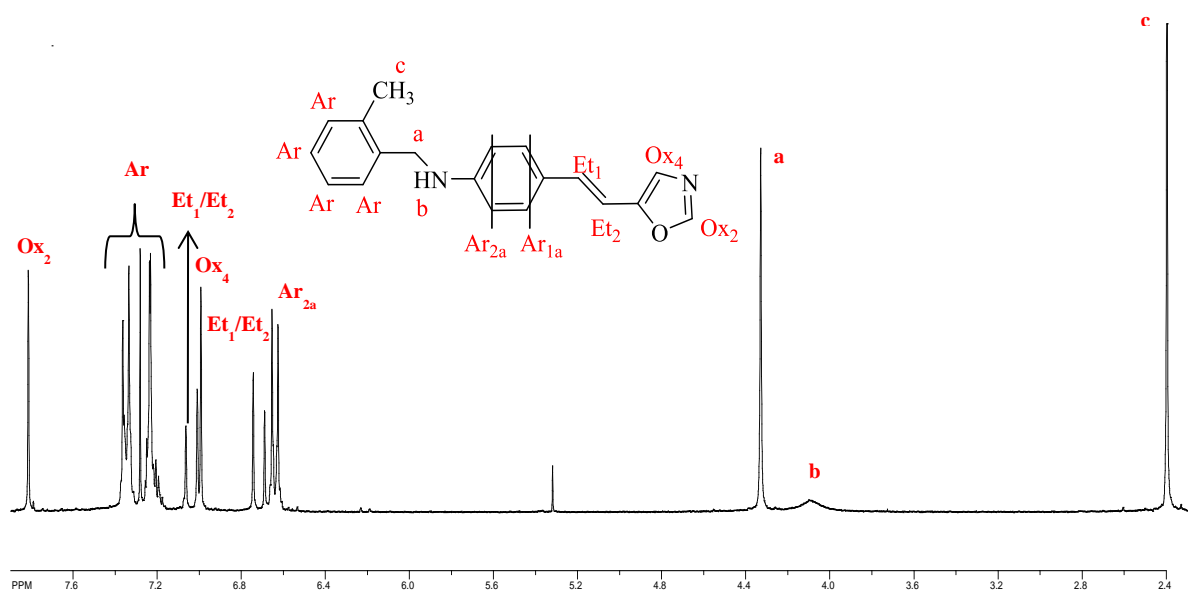

Supplemental Material

Šagud et al. Design, synthesis and cholinesterase inhibitory properties of new oxazole benzylamine derivatives, Journal of Enzyme Inhibition and Medicinal Chemistry, 2019

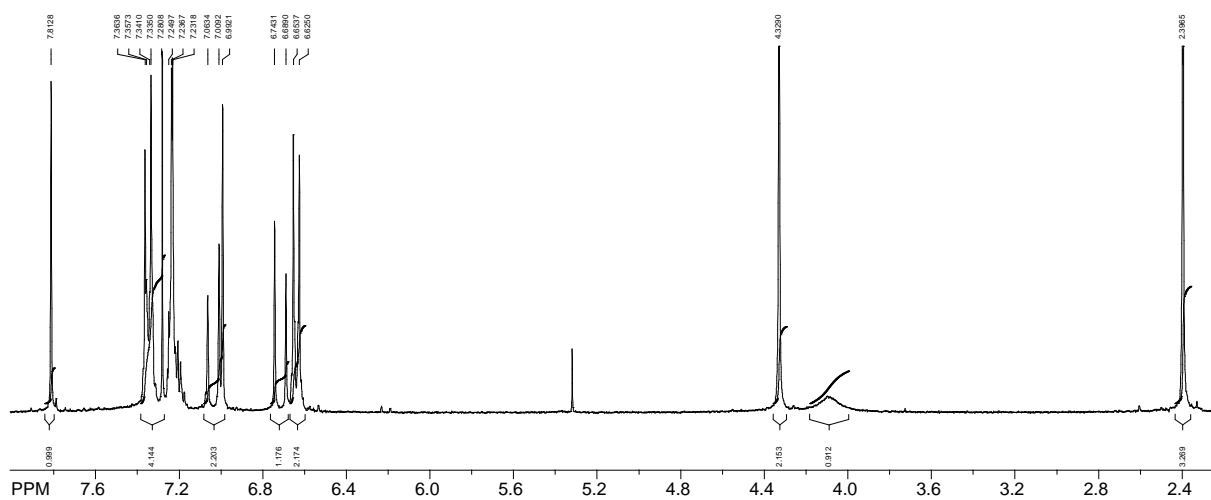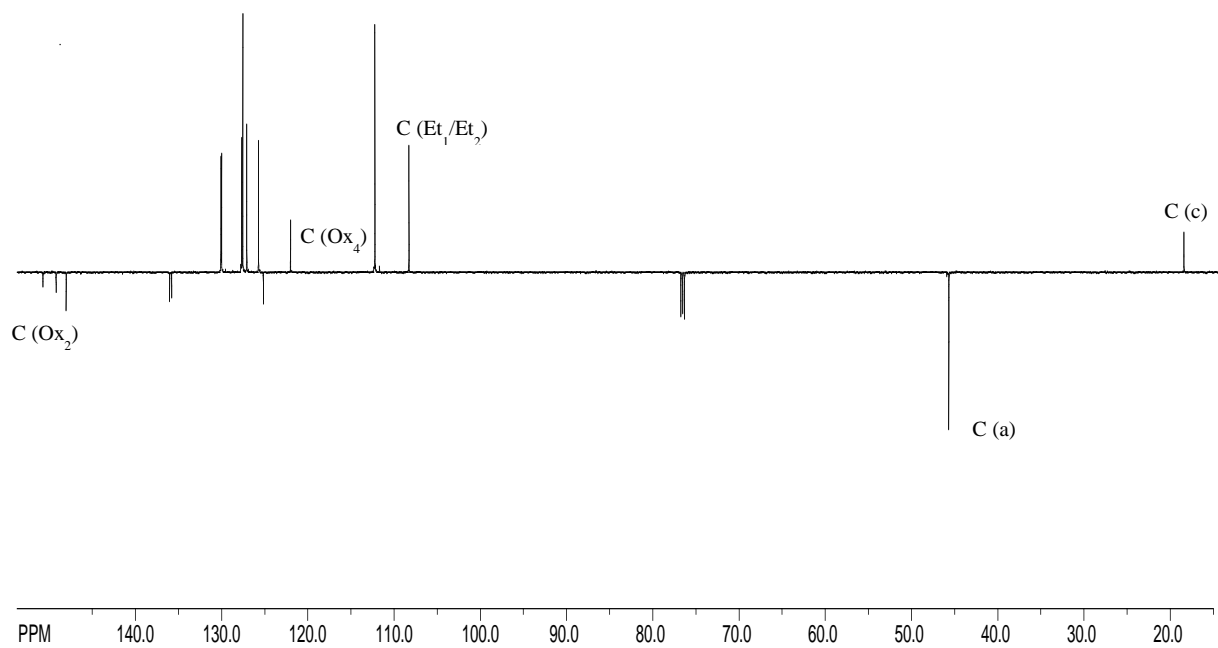

**Figure S14.**  $^1\text{H}$  and  $^{13}\text{C}$  NMR spectra of (*E*)-*N*-(2-methoxybenzyl)-4-(2-(oxazol-5-yl)vinyl)aniline (*trans*-12)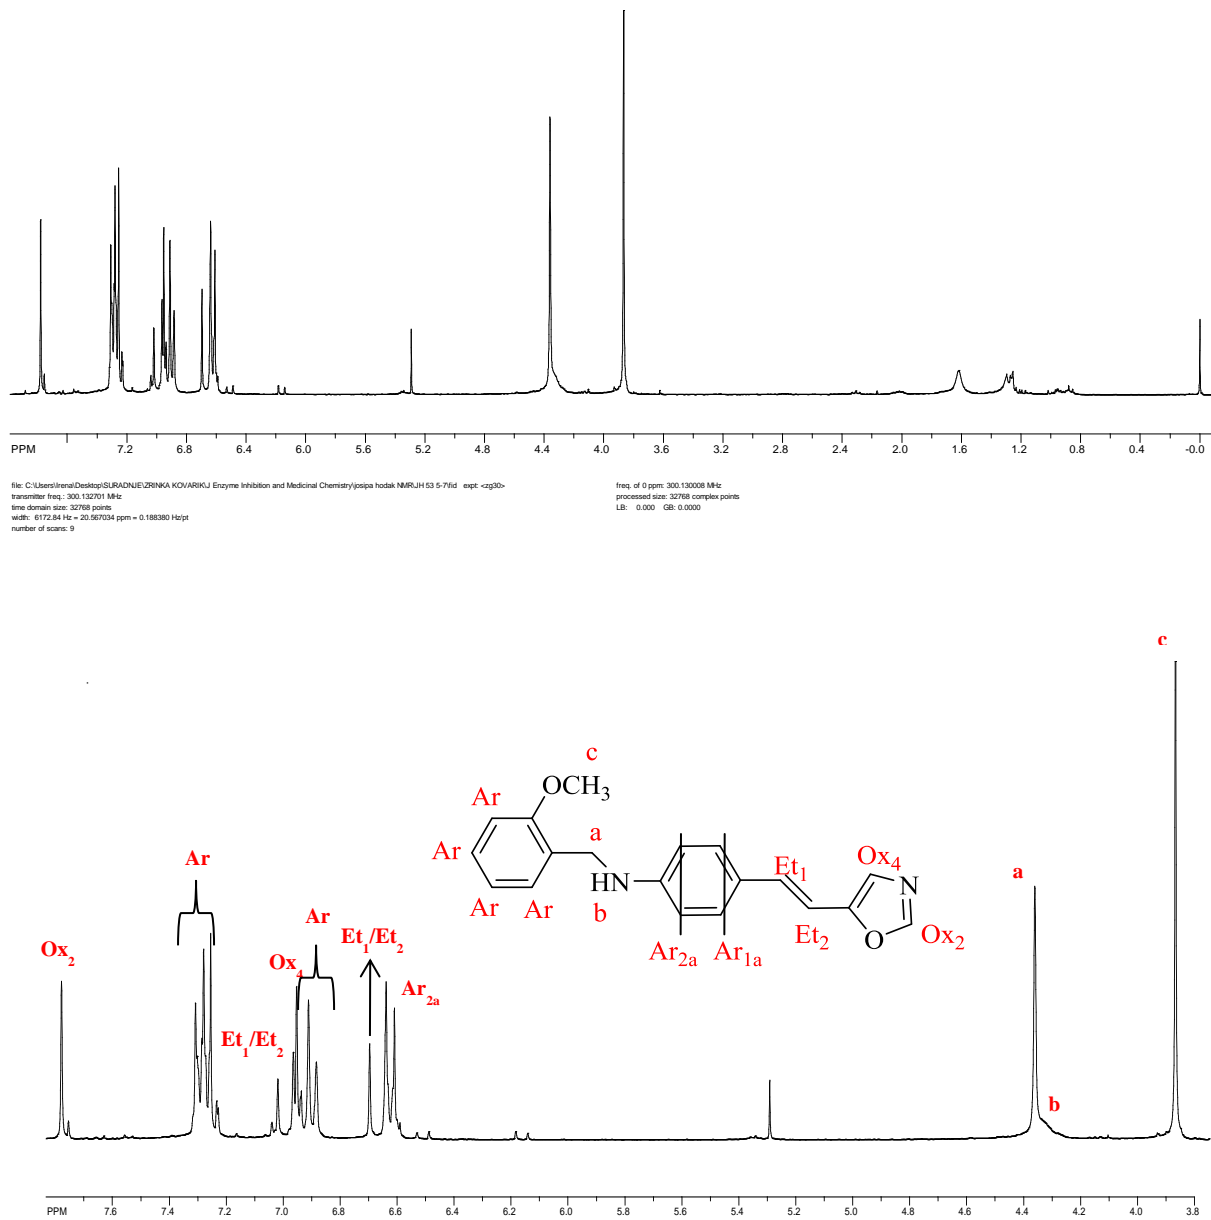

Supplemental Material

Šagud et al. Design, synthesis and cholinesterase inhibitory properties of new oxazole benzylamine derivatives, Journal of Enzyme Inhibition and Medicinal Chemistry, 2019

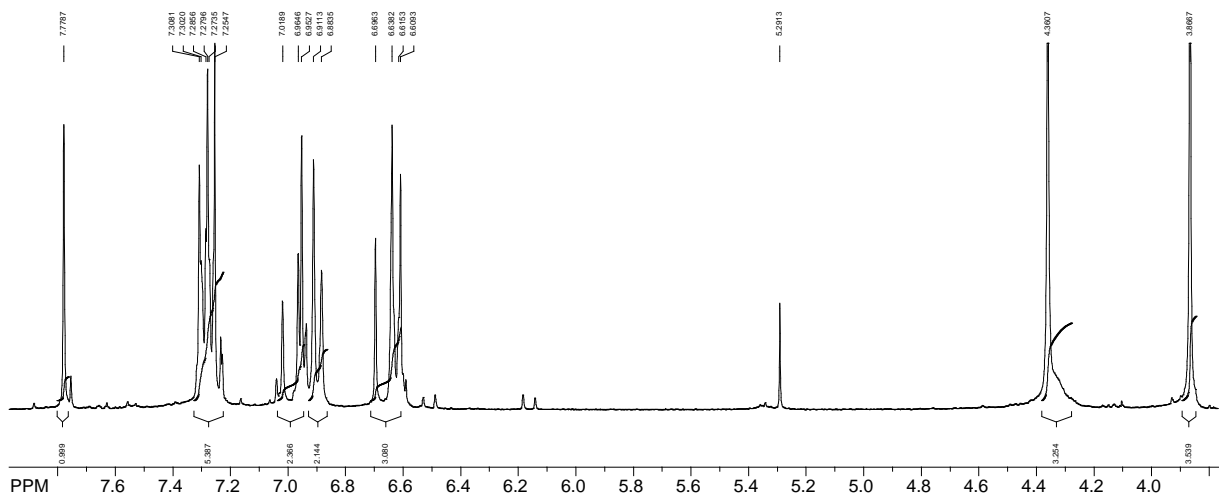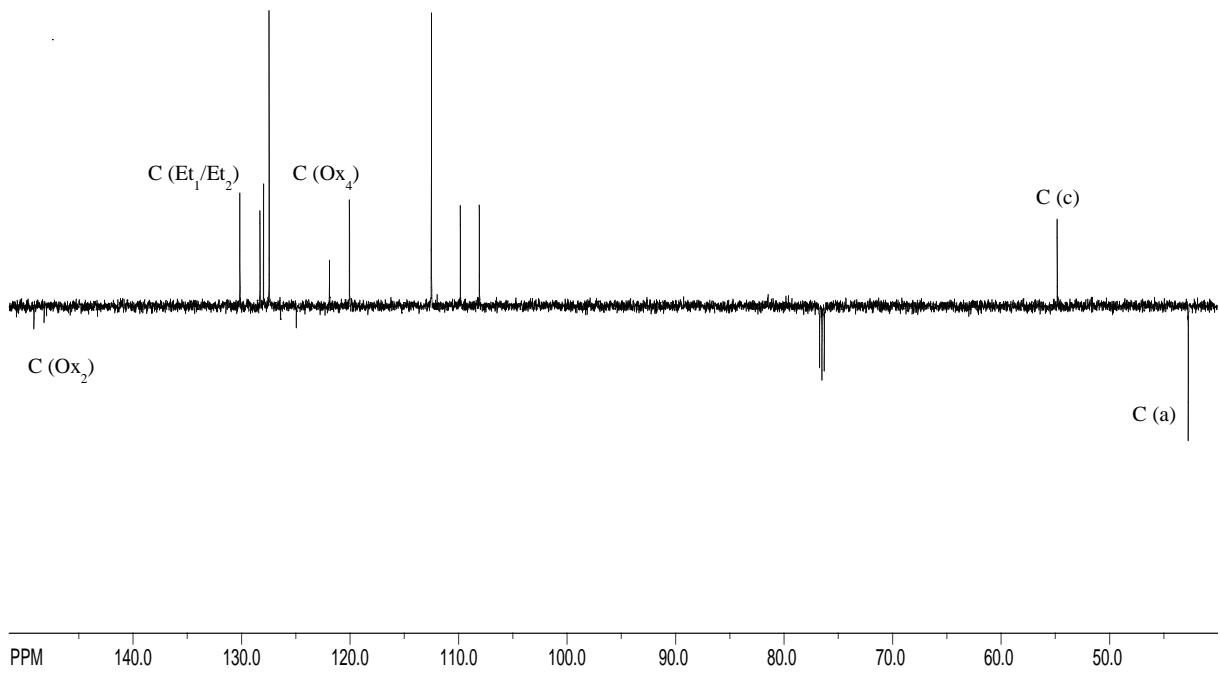

**Figure S15.**  $^1\text{H}$  and  $^{13}\text{C}$  NMR spectra of (*E*)-*N*-(2-fluorobenzyl)-4-(2-(oxazol-5-yl)vinyl)aniline (*trans*-14)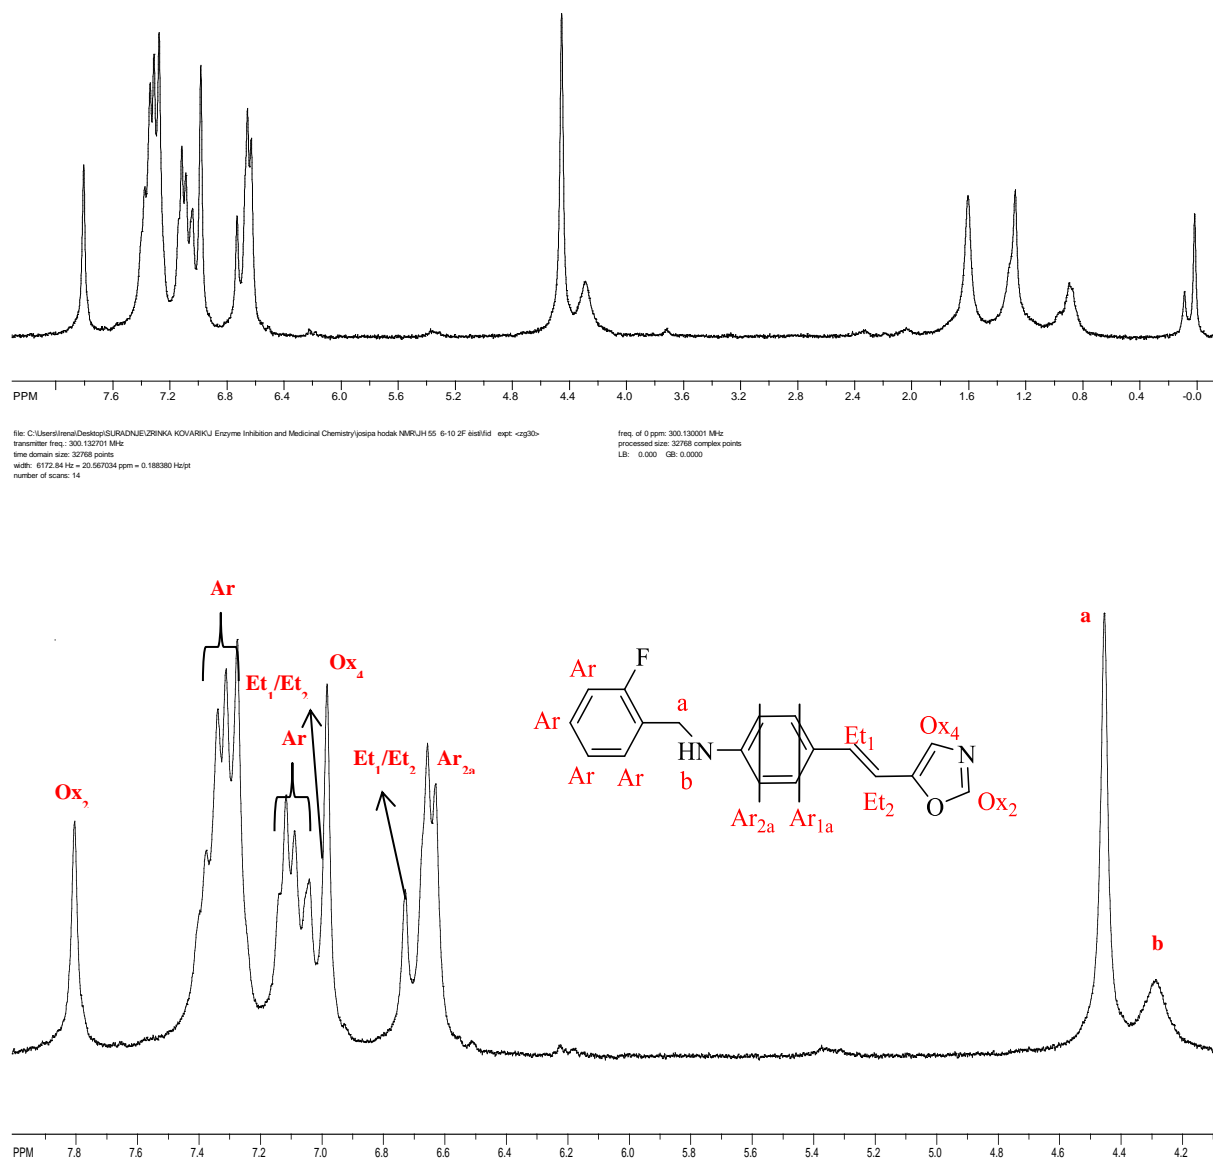

Supplemental Material

Šagud et al. Design, synthesis and cholinesterase inhibitory properties of new oxazole benzylamine derivatives, Journal of Enzyme Inhibition and Medicinal Chemistry, 2019

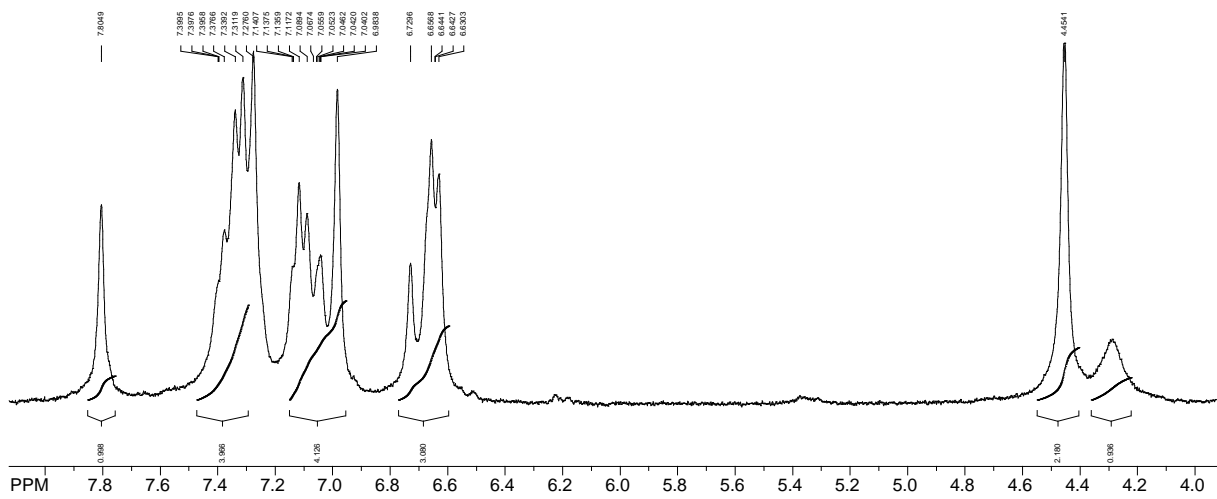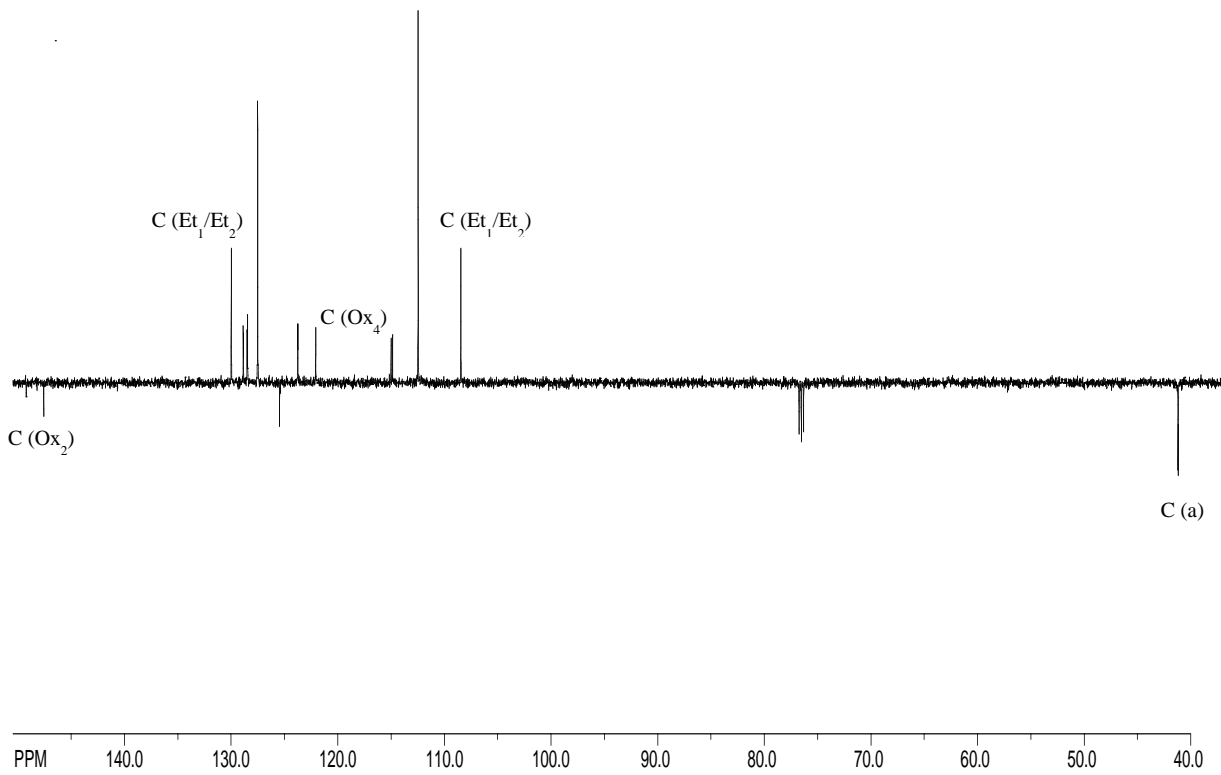

**Figure S16.**  $^1\text{H}$  and  $^{13}\text{C}$  NMR spectra of (*E*)-*N*-(furan-2-ylmethyl)-4-(2-(oxazol-5-yl)vinyl)aniline (*trans*-17)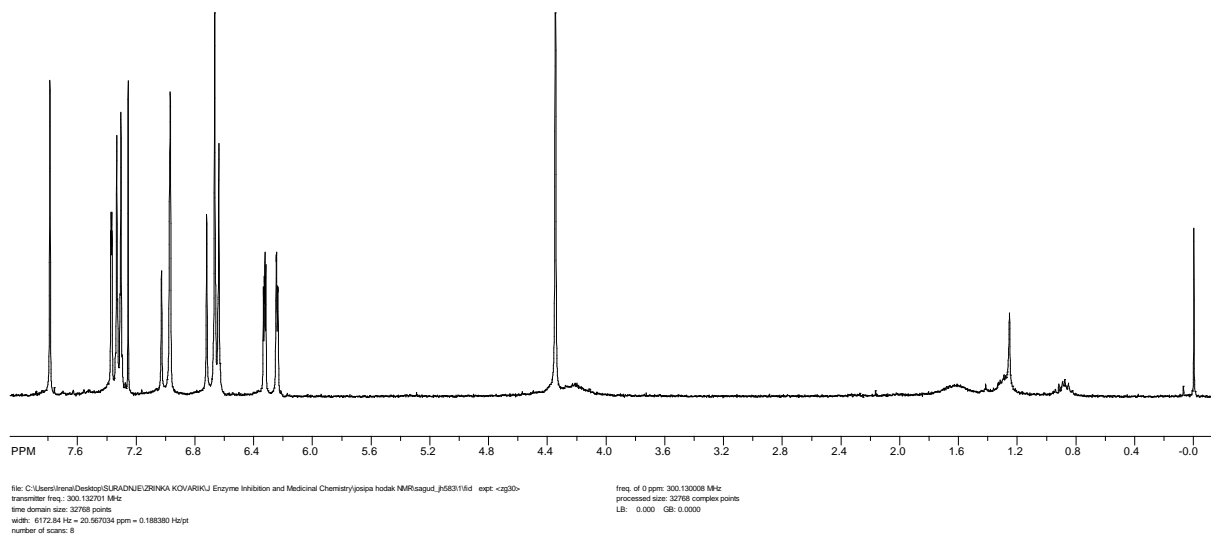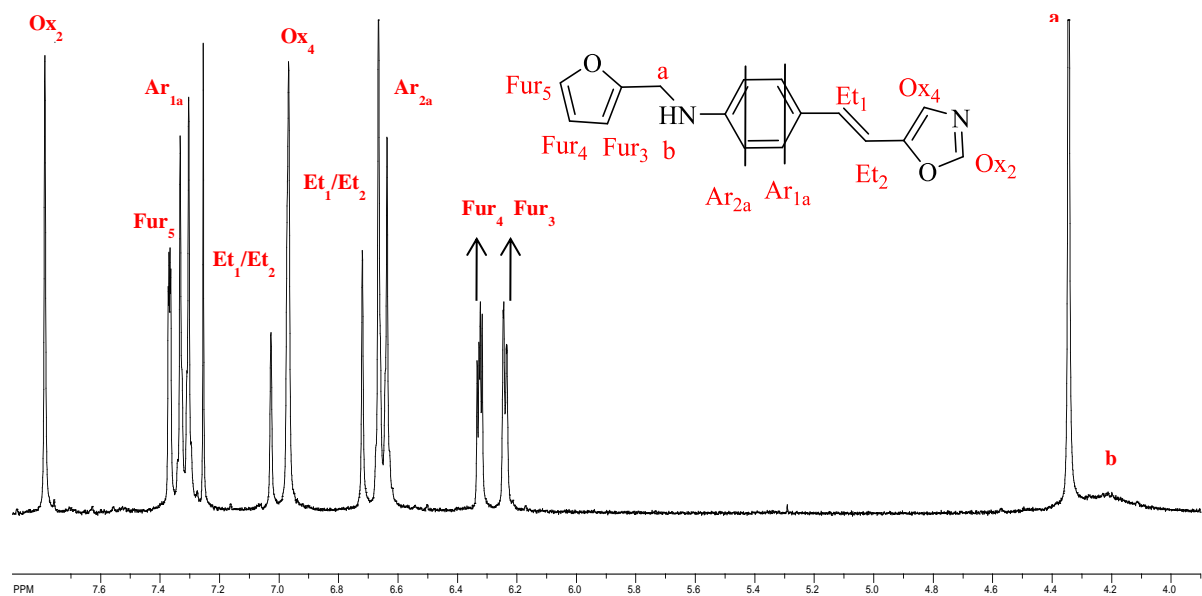

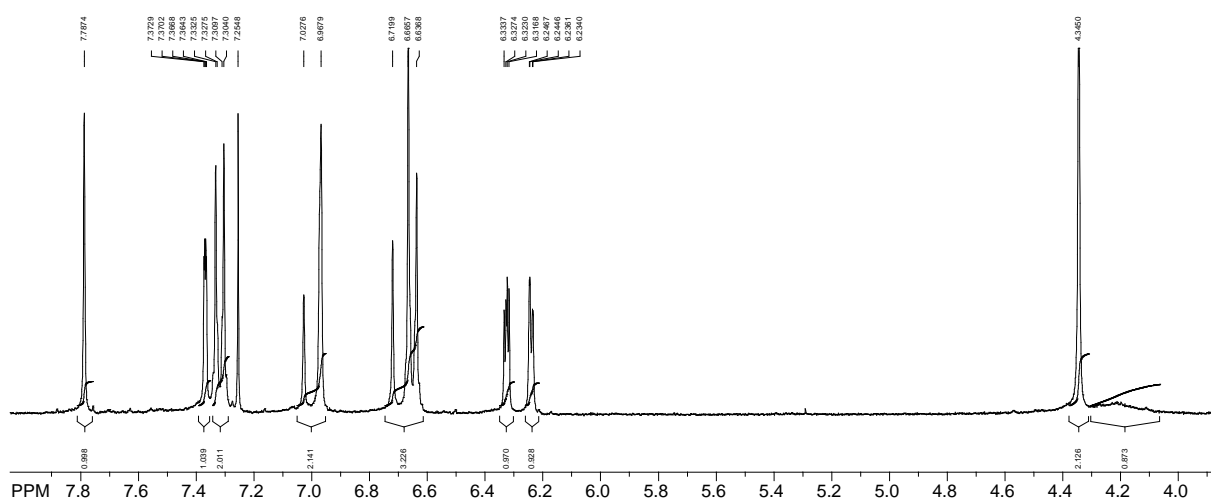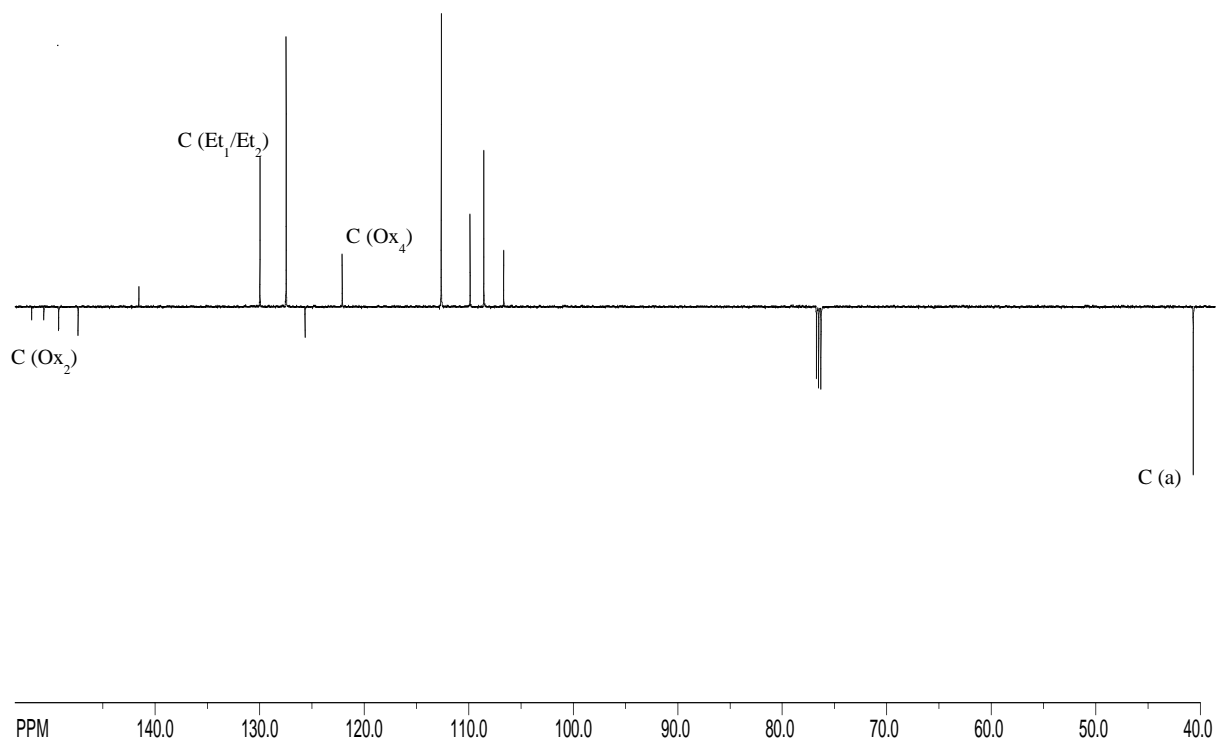



**Figure S17.**  $^1\text{H}$  and  $^{13}\text{C}$  NMR spectra of *N*-benzyl naphtho[1,2-*d*]oxazol-8-amine (**19**)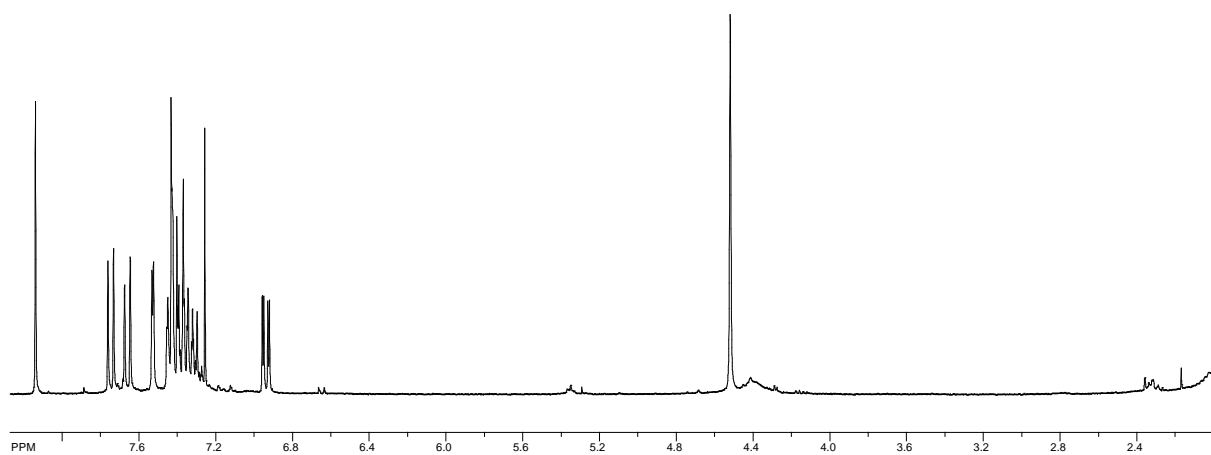

file: C:\Users\lironal\Desktop\SURADNJE\ZRNKA KOVARIKUJ Enzyme Inhibition and Medicinal Chemistry\poispa hodak NMR\JH 42 1-13\fd exp1 -c2p30->  
transmitter freq.: 300.132701 MHz  
time domain size: 32768 points  
width: 6172.84 Hz = 20.567034 ppm = 0.188380 Hz/pp  
number of scans: 14

freq. of 0 ppm: 300.130007 MHz  
processed size: 32768 complex points  
LB: 0.000 GB=0.0000

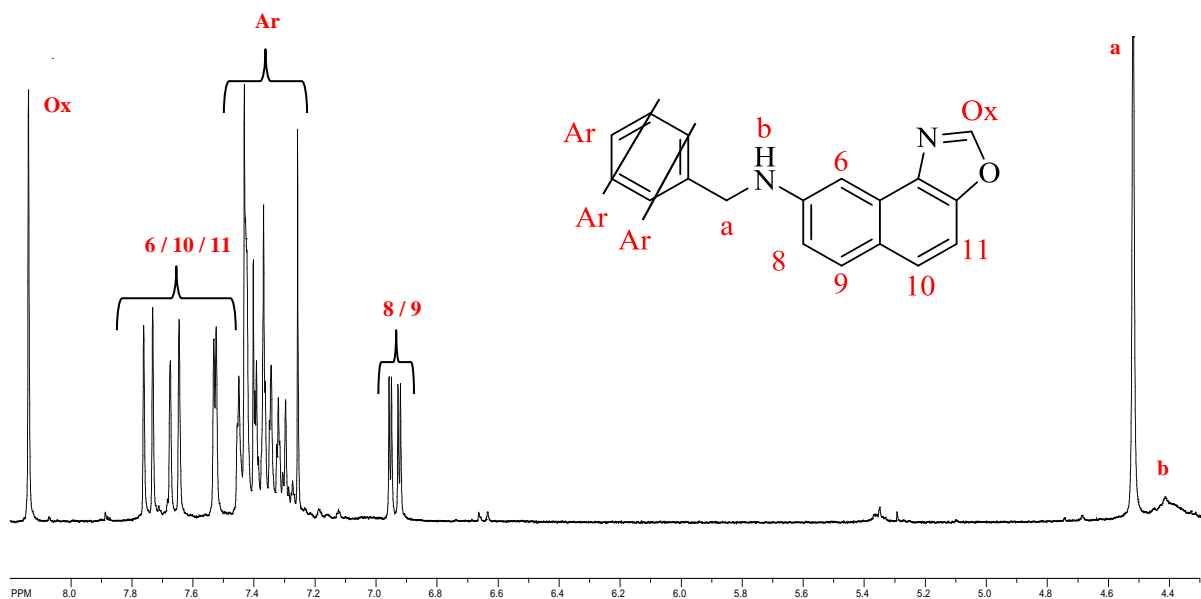

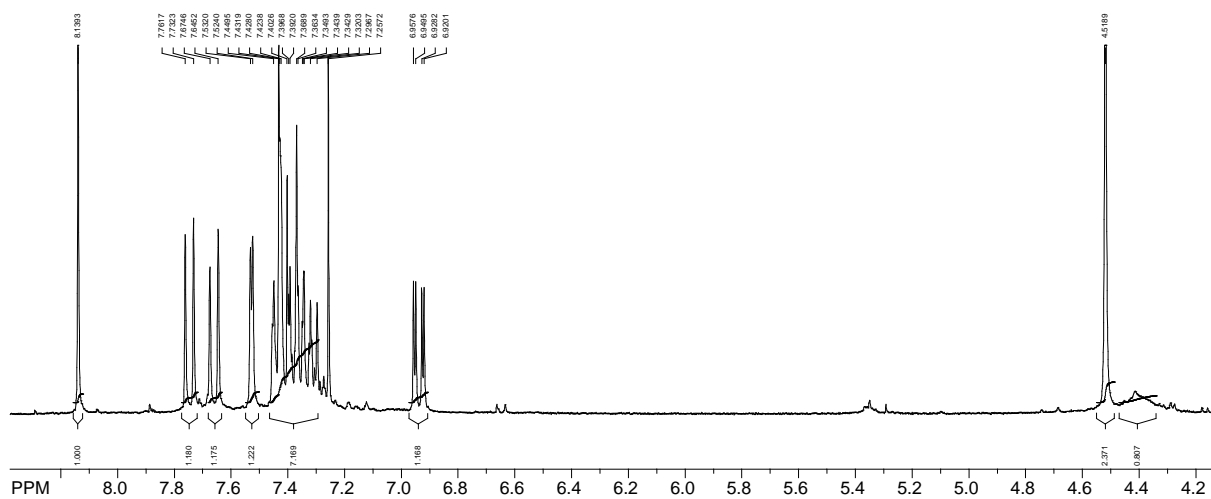

PPM 4.0 1.3 0.1 2.0 1.0 1.0 0.9 80 70 60 50

C (a)

C (Ox<sub>2</sub>)

C (Ox<sub>4</sub>)

**Figure S18.**  $^1\text{H}$  and  $^{13}\text{C}$  NMR spectra of *N*-(4-fluorobenzyl)naphtho[1,2-*d*]oxazol-8-amine (**20**)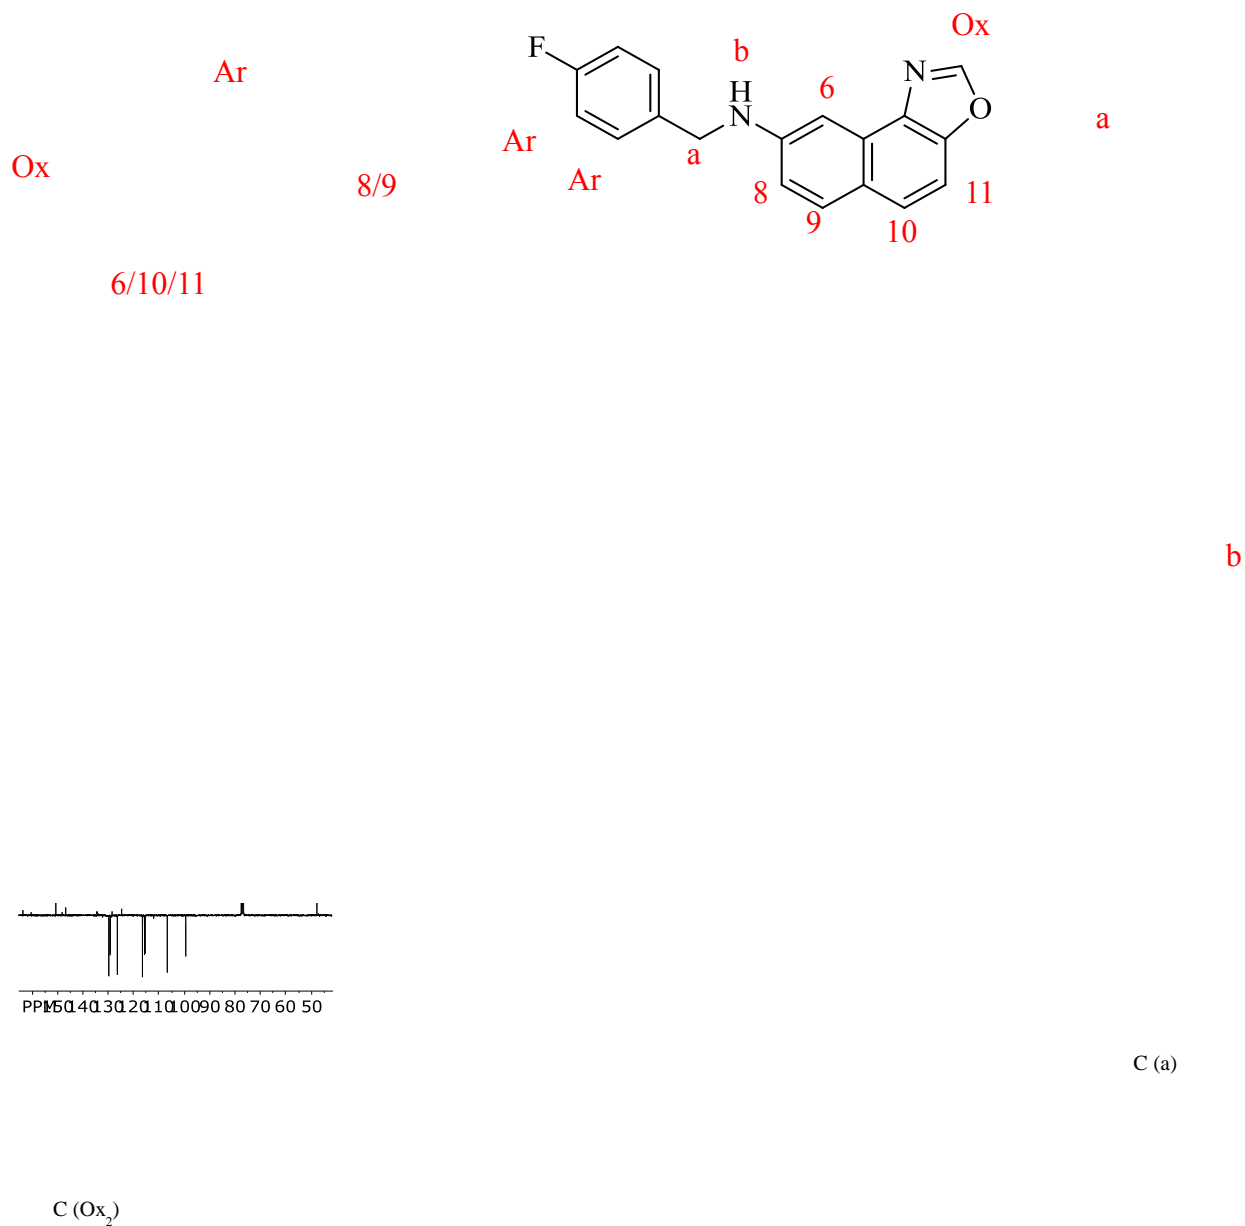

**Figure S19.**  $^1\text{H}$  NMR spectrum of *N*-(thiophen-2-ylmethyl)naphtho[1,2-*d*]oxazol-8-amine (**21**)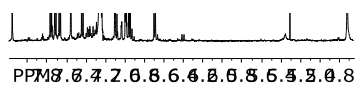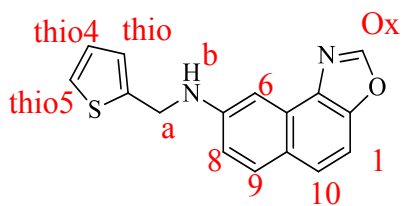

Ox

6/10/11

thio5

thio3/thio4

8/9

a

**Figure S20.** Acetylcholinesterase inhibition by *trans*-amino-5-arylethenyl-oxazole derivatives. Due to the inhibition of AChE by the solvent, DMSO, maximal tested concentration of the compounds was 100  $\mu$ M and, substrate (acetylthiocholine) concentration was 0.2 mM.

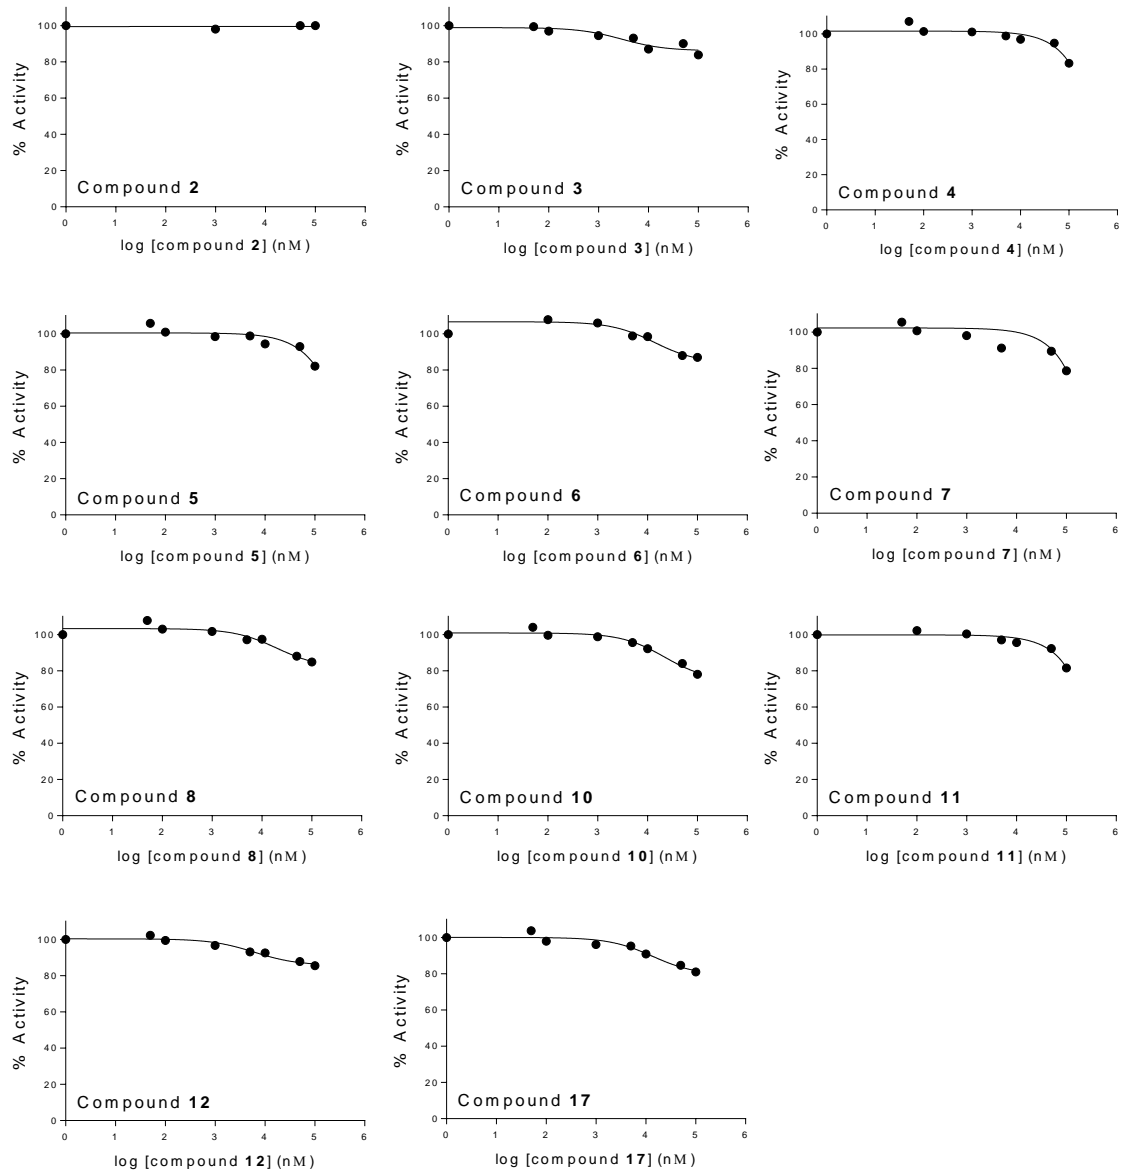

Supplement: IENZ_A_1707197_SM5345.pdf [file IENZ_A_1707197_SM5345.pdf]
